# Supplementary material for: Systematic review and meta-analysis of performance of wearable artificial intelligence in detecting and predicting depression
Source: PubMed Central journal article supplement (PMC10163239; doi:10.1038/s41746-023-00828-5), 2023-05-05
Supplement: 41746_2023_828_MOESM1_ESM.pdf [file 41746_2023_828_MOESM1_ESM.pdf]

**Supplementary Table 1: Characteristics of each included study.** NR: not reported

| <b>Study</b> <sup>Ref</sup>         | <b>Year</b> | <b>Publication type</b> | <b>Country</b> | <b>Sample size</b> | <b>Mean age</b> | <b>Age range</b> | <b>Female %</b> | <b>Participants' health condition</b> |
|-------------------------------------|-------------|-------------------------|----------------|--------------------|-----------------|------------------|-----------------|---------------------------------------|
| <b>Adamczyk</b> <sup>1</sup>        | 2021        | Journal article         | Poland         | 55                 | 40.1            | NR               | 55              | Depression, healthy                   |
| <b>Ahmed</b> <sup>2</sup>           | 2022        | Journal article         | United States  | 142                | 21.5            | 18-31            | 54.9            | Depression                            |
| <b>Aminifar</b> <sup>3</sup>        | 2021        | Conference Paper        | Norway         | 55                 | 40.1            | NR               | 55              | Depression, healthy                   |
| <b>Bai</b> <sup>4</sup>             | 2021        | Journal article         | China          | 261                | NR              | 18-60            | NR              | Depression                            |
| <b>Chikersal</b> <sup>5</sup>       | 2021        | Journal article         | United States  | 138                | NR              | NR               | NR              | Depression, healthy                   |
| <b>Cho</b> <sup>6</sup>             | 2019        | Journal article         | Korea          | 55                 | 25.9            | 21-31            | 49.1            | Depression, bipolar                   |
| <b>Choi</b> <sup>7</sup>            | 2021        | Journal article         | Korea          | 1552               | 42.1            | NR               | 55.1            | General                               |
| <b>Choi</b> <sup>8</sup>            | 2022        | Journal article         | Korea          | 14                 | 76              | 65-86            | 85.7            | General                               |
| <b>Coutts</b> <sup>9</sup>          | 2020        | Journal article         | United Kingdom | 668                | 21.9            | 18-69            | 71.2            | General                               |
| <b>Dai</b> <sup>10</sup>            | 2022        | Journal article         | United States  | 89                 | 47.1            | NR               | 76.4            | Depression                            |
| <b>Espino-Salinas</b> <sup>11</sup> | 2022        | Journal article         | Mexico         | 55                 | 40.1            | NR               | 55              | Depression, healthy                   |
| <b>Frogner</b> <sup>12</sup>        | 2019        | Conference Paper        | Norway         | 55                 | 40.1            | NR               | 55              | Depression, healthy                   |
| <b>Fukuda</b> <sup>13</sup>         | 2020        | Conference Paper        | Japan          | 60                 | NR              | NR               | NR              | General                               |
| <b>Galvan-Tejada</b> <sup>14</sup>  | 2019        | Journal article         | Mexico         | 55                 | 40.1            | NR               | 55              | Depression, healthy                   |
| <b>Garcia-Ceja</b> <sup>15</sup>    | 2018        | Conference Paper        | Norway         | 55                 | 40.1            | NR               | 55              | Depression, healthy                   |
| <b>Garcia-Ceja</b> <sup>16</sup>    | 2018        | Conference Paper        | Norway         | 55                 | 40.1            | NR               | 55              | Depression, healthy                   |
| <b>Ghandeharioun</b> <sup>17</sup>  | 2017        | Conference Paper        | United States  | 12                 | 37              | 20-73            | 75              | Depression                            |
| <b>Griffiths</b> <sup>18</sup>      | 2022        | Journal article         | United Kingdom | 17                 | 46.8            | 21-69            | 79              | Depression                            |
| <b>Horwitz</b> <sup>19</sup>        | 2022        | Journal article         | United States  | 2459               | 27.6            | NR               | 55.1            | General                               |
| <b>Jacobson</b> <sup>20</sup>       | 2019        | Journal article         | United States  | 55                 | 40.1            | NR               | 55              | Depression, healthy                   |
| <b>Jakobsen</b> <sup>21</sup>       | 2020        | Journal article         | Norway         | 55                 | 40.1            | NR               | 55              | Depression, healthy                   |
| <b>Jin</b> <sup>22</sup>            | 2020        | Journal article         | China          | 60                 | NR              | 18-26            | 50              | General                               |
| <b>Jung</b> <sup>23</sup>           | 2022        | Conference Paper        | Korea          | 45                 | 76.7            | >64              | 66              | Depression, healthy                   |
| <b>Kim</b> <sup>24</sup>            | 2019        | Journal article         | Korea          | 47                 | 78              | NR               | 94              | Depression                            |
| <b>Kulam</b> <sup>25</sup>          | 2019        | Thesis                  | Norway         | 55                 | 40.1            | NR               | 55              | Depression, healthy                   |
| <b>Kumar</b> <sup>26</sup>          | 2022        | Journal article         | United Kingdom | 55                 | 40.1            | NR               | 55              | Depression, healthy                   |
| <b>Lee</b> <sup>27</sup>            | 2022        | Journal article         | Korea          | 270                | 23.3            | NR               | 54.4            | Depression, bipolar                   |
| <b>Llamocca</b> <sup>28</sup>       | 2021        | Journal article         | Spain          | 17                 | NR              | NR               | NR              | Bipolar                               |
| <b>Lu</b> <sup>29</sup>             | 2018        | Journal article         | United States  | 103                | NR              | 18-25            | 76.7            | Depression, healthy                   |
| <b>Mahendran</b> <sup>30</sup>      | 2019        | Journal article         | India          | 450                | 40              | NR               | NR              | Mood swings                           |
| <b>Makhmutova</b> <sup>31</sup>     | 2021        | Thesis                  | Switzerland    | 4036               | 37.2            | 18-85            | 73.7            | General                               |
| <b>Makhmutova</b> <sup>32</sup>     | 2022        | Journal article         | Switzerland    | 4036               | 37.2            | 18-85            | 73.7            | General                               |

|                                       |      |                  |               |     |      |       |      |                                    |
|---------------------------------------|------|------------------|---------------|-----|------|-------|------|------------------------------------|
| <b>Mallikarjun</b> <sup>33</sup>      | 2020 | Journal article  | India         | 86  | NR   | NR    | 100  | General                            |
| <b>Minaeva</b> <sup>34</sup>          | 2020 | Journal article  | Netherlands   | 179 | 46.5 | NR    | 64   | Depression, healthy                |
| <b>Mullick</b> <sup>35</sup>          | 2022 | Journal article  | United States | 55  | 15.5 | 12-18 | 74.5 | Depression                         |
| <b>Narziev</b> <sup>36</sup>          | 2020 | Journal article  | Korea         | 20  | NR   | NR    | NR   | Depression, healthy                |
| <b>Nguyen</b> <sup>37</sup>           | 2021 | Conference Paper | Taiwan        | 55  | 40.1 | NR    | 55   | Depression, healthy                |
| <b>Nishimura</b> <sup>38</sup>        | 2022 | Conference Paper | Japan         | 100 | 42.1 | NR    | 37   | General                            |
| <b>Opoku Asare</b> <sup>39</sup>      | 2022 | Journal article  | Finland       | 54  | 43   | 24-68 | 55.6 | Depression, healthy                |
| <b>Pacheco-Gonzalez</b> <sup>40</sup> | 2019 | Journal article  | Mexico        | 55  | 40.1 | NR    | 55   | Depression, healthy                |
| <b>Pedrelli</b> <sup>41</sup>         | 2020 | Journal article  | United States | 31  | 33.7 | 19-73 | 74   | Depression                         |
| <b>Price</b> <sup>42</sup>            | 2022 | Journal article  | United States | 55  | 40.1 | NR    | 55   | Depression, healthy                |
| <b>Qian</b> <sup>43</sup>             | 2019 | Conference Paper | Japan         | 83  | 38.4 | 22-58 | 2.4  | Depression, healthy                |
| <b>Raihan</b> <sup>44</sup>           | 2021 | Conference Paper | Bangladesh    | 55  | 40.1 | NR    | 55   | Depression, healthy                |
| <b>Rodríguez-Ruiz</b> <sup>45</sup>   | 2020 | Journal article  | Mexico        | 55  | 40.1 | NR    | 55   | Depression, healthy                |
| <b>Rodríguez-Ruiz</b> <sup>46</sup>   | 2020 | Journal article  | Mexico        | 55  | 40.1 | NR    | 55   | Depression, healthy                |
| <b>Rodríguez-Ruiz</b> <sup>47</sup>   | 2022 | Journal article  | Mexico        | 109 | 40.8 | NR    | 48.8 | Depression, healthy, schizophrenia |
| <b>Rykov</b> <sup>48</sup>            | 2021 | Journal article  | Singapore     | 267 | 33   | 21-64 | 63.7 | General                            |
| <b>Shah</b> <sup>49</sup>             | 2021 | Journal article  | United States | 14  | 21.6 | NR    | 71.4 | Depression                         |
| <b>Tazawa</b> <sup>50</sup>           | 2020 | Journal article  | Japan         | 86  | 60.2 | NR    | 46.5 | Depression, healthy                |
| <b>Valenza</b> <sup>51</sup>          | 2015 | Journal article  | Italy         | 8   | NR   | NR    | NR   | Bipolar                            |
| <b>Wang</b> <sup>52</sup>             | 2018 | Conference Paper | United States | 83  | 20.1 | NR    | 51.8 | General                            |
| <b>Xu</b> <sup>53</sup>               | 2019 | Journal article  | United States | 350 | NR   | NR    | NR   | General                            |
| <b>Zanella-Calzada</b> <sup>54</sup>  | 2019 | Journal article  | Mexico        | 55  | 40.1 | NR    | 55   | Depression, healthy                |

- 1 Adamczyk, J. & Malawski, F. Comparison of Manual and Automated Feature Engineering for Daily Activity Classification in Mental Disorder Diagnosis. *Computing and Informatics* **40**, 850–879-850–879 (2021).
- 2 Ahmed, A. *et al.* Investigating the Feasibility of Assessing Depression Severity and Valence-Arousal with Wearable Sensors Using Discrete Wavelet Transforms and Machine Learning. *Information* **13**, 406 (2022).
- 3 Aminifar, A., Rabbi, F., Pun, V. K. I. & Lamo, Y. Monitoring Motor Activity Data for Detecting Patients' Depression Using Data Augmentation and Privacy-Preserving Distributed Learning. *Annu Int Conf IEEE Eng Med Biol Soc* **2021**, 2163-2169, doi:10.1109/embc46164.2021.9630592 (2021).

- 4 Bai, R. *et al.* Tracking and Monitoring Mood Stability of Patients With Major Depressive Disorder by Machine Learning Models Using Passive Digital Data: Prospective Naturalistic Multicenter Study. *JMIR Mhealth Uhealth* **9**, e24365, doi:10.2196/24365 (2021).
- 5 Chikersal, P. *et al.* Detecting Depression and Predicting its Onset Using Longitudinal Symptoms Captured by Passive Sensing: A Machine Learning Approach With Robust Feature Selection. *ACM Trans. Comput.-Hum. Interact.* **28**, Article 3, doi:10.1145/3422821 (2021).
- 6 Cho, C. H. *et al.* Mood Prediction of Patients With Mood Disorders by Machine Learning Using Passive Digital Phenotypes Based on the Circadian Rhythm: Prospective Observational Cohort Study. *J Med Internet Res* **21**, e11029, doi:10.2196/11029 (2019).
- 7 Choi, J. G., Ko, I. & Han, S. Depression Level Classification Using Machine Learning Classifiers Based on Actigraphy Data. *IEEE Access* **9**, 116622-116646, doi:10.1109/ACCESS.2021.3105393 (2021).
- 8 Choi, J., Lee, S., Kim, S., Kim, D. & Kim, H. Depressed Mood Prediction of Elderly People with a Wearable Band. *Sensors (Basel)* **22**, doi:10.3390/s22114174 (2022).
- 9 Coutts, L. V., Plans, D., Brown, A. W. & Collomosse, J. Deep learning with wearable based heart rate variability for prediction of mental and general health. *J Biomed Inform* **112**, 103610, doi:10.1016/j.jbi.2020.103610 (2020).
- 10 Dai, R. *et al.* Multi-Task Learning for Randomized Controlled Trials: A Case Study on Predicting Depression with Wearable Data. *Proc. ACM Interact. Mob. Wearable Ubiquitous Technol.* **6**, Article 50, doi:10.1145/3534591 (2022).
- 11 Espino-Salinas, C. H. *et al.* Two-Dimensional Convolutional Neural Network for Depression Episodes Detection in Real Time Using Motor Activity Time Series of Depresjon Dataset. **9**, 458 (2022).
- 12 Frogner, J. I. *et al.* in *Proceedings of the 4th International Workshop on Multimedia for Personal Health & Health Care* 9–15 (Association for Computing Machinery, Nice, France, 2019).
- 13 Fukuda, S., Matsuda, Y., Tani, Y., Arakawa, Y. & Yasumoto, K. in *2020 IEEE International Conference on Pervasive Computing and Communications Workshops (PerCom Workshops)*. 1-6.
- 14 Galván-Tejada, C. E. *et al.* Depression Episodes Detection in Unipolar and Bipolar Patients: A Methodology with Feature Extraction and Feature Selection with Genetic Algorithms Using Activity Motion Signal as Information Source. *Mobile Information Systems* **2019**, 8269695, doi:10.1155/2019/8269695 (2019).
- 15 Garcia-Ceja, E. *et al.* in *Proceedings of the 9th ACM Multimedia Systems Conference* 472–477 (Association for Computing Machinery, Amsterdam, Netherlands, 2018).
- 16 Garcia-Ceja, E. *et al.* in *2018 IEEE 31st International Symposium on Computer-Based Medical Systems (CBMS)*. 316-321.
- 17 Ghandeharioun, A. *et al.* in *2017 Seventh International Conference on Affective Computing and Intelligent Interaction (ACII)*. 325-332.
- 18 Griffiths, C. *et al.* Investigation of physical activity, sleep, and mental health recovery in treatment resistant depression (TRD) patients receiving repetitive transcranial magnetic stimulation (rTMS) treatment. *J Affect Disord Rep* **8**, 100337, doi:10.1016/j.jadr.2022.100337 (2022).
- 19 Horwitz, A. G. *et al.* Using machine learning with intensive longitudinal data to predict depression and suicidal ideation among medical interns over time. *Psychol Med*, 1-8, doi:10.1017/s0033291722003014 (2022).
- 20 Jacobson, N. C., Weingarden, H. & Wilhelm, S. Digital biomarkers of mood disorders and symptom change. *npj Digital Medicine* **2**, 3, doi:10.1038/s41746-019-0078-0 (2019).

- 21 Jakobsen, P. *et al.* Applying machine learning in motor activity time series of depressed bipolar and unipolar patients compared to healthy controls. *PLoS One* **15**, e0231995, doi:10.1371/journal.pone.0231995 (2020).
- 22 Jin, J. *et al.* Attention-Block Deep Learning Based Features Fusion in Wearable Social Sensor for Mental Wellbeing Evaluations. *IEEE Access* **8**, 89258-89268, doi:10.1109/ACCESS.2020.2994124 (2020).
- 23 Jung, D., Kim, J. & Mun, K. R. Identifying Depression in the Elderly Using Gait Accelerometry. *Annu Int Conf IEEE Eng Med Biol Soc* **2022**, 4946-4949, doi:10.1109/embc48229.2022.9871877 (2022).
- 24 Kim, H. *et al.* Depression Prediction by Using Ecological Momentary Assessment, Actiwatch Data, and Machine Learning: Observational Study on Older Adults Living Alone. *JMIR Mhealth Uhealth* **7**, e14149, doi:10.2196/14149 (2019).
- 25 Kulam, S. *Time-Series Classification with Uni-Dimensional Convolutional Neural Networks: An Experimental Comparison with Long Short-Term Memory Networks*, (2019).
- 26 Kumar, A., Sangwan, S. R., Arora, A. & Menon, V. G. Depress-DCNF: A deep convolutional neuro-fuzzy model for detection of depression episodes using IoMT. *Applied Soft Computing* **122**, 108863, doi:<https://doi.org/10.1016/j.asoc.2022.108863> (2022).
- 27 Lee, H. J. *et al.* Prediction of impending mood episode recurrence using real-time digital phenotypes in major depression and bipolar disorders in South Korea: a prospective nationwide cohort study. *Psychol Med*, 1-9, doi:10.1017/s0033291722002847 (2022).
- 28 Llamocca, P., López, V., Santos, M. & Čukić, M. Personalized Characterization of Emotional States in Patients with Bipolar Disorder. *Mathematics* **9**, doi:10.3390/math9111174 (2021).
- 29 Lu, J. *et al.* Joint Modeling of Heterogeneous Sensing Data for Depression Assessment via Multi-task Learning. *Proc. ACM Interact. Mob. Wearable Ubiquitous Technol.* **2**, Article 21, doi:10.1145/3191753 (2018).
- 30 Mahendran, N. *et al.* Sensor-Assisted Weighted Average Ensemble Model for Detecting Major Depressive Disorder. *Sensors (Basel)* **19**, doi:10.3390/s19224822 (2019).
- 31 Makhmutova, M. *Predicting changes in depression using person-generated health data* Master degree thesis, Ecole polytechnique federale de Lausanne, (2021).
- 32 Makhmutova, M. *et al.* Predicting Changes in Depression Severity Using the PSYCHE-D (Prediction of Severity Change-Depression) Model Involving Person-Generated Health Data: Longitudinal Case-Control Observational Study. *JMIR Mhealth Uhealth* **10**, e34148, doi:10.2196/34148 (2022).
- 33 Mallikarjun, H. M. & Manimegalai, P. Manoglanistara - Emotional Wellness Phases Prediction of Adolescent Female Students by using Brain Waves. *Current Signal Transduction Therapy* **15**, 315-323, doi:10.2174/1574362414666190703151853 (2020).
- 34 Minaeva, O. *et al.* Screening for Depression in Daily Life: Development and External Validation of a Prediction Model Based on Actigraphy and Experience Sampling Method. *J Med Internet Res* **22**, e22634, doi:10.2196/22634 (2020).
- 35 Mullick, T., Radovic, A., Shaaban, S. & Doryab, A. Predicting Depression in Adolescents Using Mobile and Wearable Sensors: Multimodal Machine Learning-Based Exploratory Study. *JMIR Form Res* **6**, e35807, doi:10.2196/35807 (2022).
- 36 Narziev, N. *et al.* STDD: Short-Term Depression Detection with Passive Sensing. *Sensors (Basel)* **20**, doi:10.3390/s20051396 (2020).
- 37 Nguyen, D.-K., Chan, C.-L., Li, A.-H. A. & Phan, D.-V. in *2021 5th International Conference on Medical and Health Informatics* 7–12 (Association for Computing Machinery, Kyoto, Japan, 2021).

- 38 Nishimura, Y. *et al.* in *Sensor-and Video-Based Activity and Behavior Computing* 1-26 (Springer, 2022).
- 39 Asare, K. O. *et al.* Mood ratings and digital biomarkers from smartphone and wearable data differentiates and predicts depression status: A longitudinal data analysis. *Pervasive and Mobile Computing* **83**, 101621, doi:<https://doi.org/10.1016/j.pmcj.2022.101621> (2022).
- 40 Pacheco-González, S. L. *et al.* Evaluation of Five Classifiers for Depression Episodes Detection. *Res. Comput. Sci.* **148**, 129-138, doi:10.13053/rcs-148-10-11 (2019).
- 41 Pedrelli, P. *et al.* Monitoring Changes in Depression Severity Using Wearable and Mobile Sensors. *Front Psychiatry* **11**, 584711, doi:10.3389/fpsy.2020.584711 (2020).
- 42 Price, G. D. *et al.* An unsupervised machine learning approach using passive movement data to understand depression and schizophrenia. *J Affect Disord* **316**, 132-139, doi:10.1016/j.jad.2022.08.013 (2022).
- 43 Qian, K. *et al.* in *Proceedings of the Third International Symposium on Image Computing and Digital Medicine* 71–75 (Association for Computing Machinery, Xi'an, China, 2019).
- 44 Raihan, M., Bairagi, A. K. & Rahman, S. in *2021 12th International Conference on Computing Communication and Networking Technologies (ICCCNT)*. 1-5.
- 45 Rodríguez-Ruiz, J. G., Galván-Tejada, C. E., Vázquez-Reyes, S., Galván-Tejada, J. I. & Gamboa-Rosales, H. Classification of Depressive Episodes Using Nighttime Data; a Multivariate and Univariate Analysis. *Program. Comput. Softw.* **46**, 689–698, doi:10.1134/s0361768820080198 (2020).
- 46 Rodríguez-Ruiz, J. G. *et al.* Comparison of Night, Day and 24 h Motor Activity Data for the Classification of Depressive Episodes. *Diagnostics (Basel)* **10**, doi:10.3390/diagnostics10030162 (2020).
- 47 Rodríguez-Ruiz, J. G. *et al.* Classification of Depressive and Schizophrenic Episodes Using Night-Time Motor Activity Signal. *Healthcare (Basel)* **10**, doi:10.3390/healthcare10071256 (2022).
- 48 Rykov, Y., Thach, T. Q., Bojic, I., Christopoulos, G. & Car, J. Digital Biomarkers for Depression Screening With Wearable Devices: Cross-sectional Study With Machine Learning Modeling. *JMIR Mhealth Uhealth* **9**, e24872, doi:10.2196/24872 (2021).
- 49 Shah, R. V. *et al.* Personalized machine learning of depressed mood using wearables. *Translational Psychiatry* **11**, 338, doi:10.1038/s41398-021-01445-0 (2021).
- 50 Tazawa, Y. *et al.* Evaluating depression with multimodal wristband-type wearable device: screening and assessing patient severity utilizing machine-learning. *Heliyon* **6**, e03274, doi:10.1016/j.heliyon.2020.e03274 (2020).
- 51 Valenza, G. *et al.* Characterization of depressive States in bipolar patients using wearable textile technology and instantaneous heart rate variability assessment. *IEEE J Biomed Health Inform* **19**, 263-274, doi:10.1109/jbhi.2014.2307584 (2015).
- 52 Wang, R. *et al.* Tracking Depression Dynamics in College Students Using Mobile Phone and Wearable Sensing. *Proc. ACM Interact. Mob. Wearable Ubiquitous Technol.* **2**, Article 43, doi:10.1145/3191775 (2018).
- 53 Xu, X. *et al.* Leveraging Routine Behavior and Contextually-Filtered Features for Depression Detection among College Students. *Proc. ACM Interact. Mob. Wearable Ubiquitous Technol.* **3**, Article 116, doi:10.1145/3351274 (2019).

- 54 Zanella-Calzada, L. A. *et al.* Feature Extraction in Motor Activity Signal: Towards a Depression Episodes Detection in Unipolar and Bipolar Patients. *Diagnostics (Basel)* **9**, doi:10.3390/diagnostics9010008 (2019).

**Supplementary Table 2: Features of wearable AI.** ANN: Artificial Neural Network; BDI-II: Beck Depression Inventory-II; BPRS: Brief Psychiatric Rating Scale; BT: Boosted Trees; CNN: Convolutional Neural Network; DAMS: Depression and Anxiety Mood Scale; DART: Dropouts Meet Multiple Additive Regression Trees; DASS: Depression Anxiety Stress Scales; DCFN: Deep convolutional neuro fuzzy; DNN: Deep Neural Network; DSM: Diagnostic and Statistical Manual of Mental Health; DT: Decision tree; ECG: Electrocardiograph; EDA: Electrodermal activity ; EEG: Electroencephalograph; ERT: Extremely Randomized Trees; GMM: Gaussian mixture models; HDRS: Hamilton Depression Rating Scale; ID3: Iterative Dichotomiser 3; KNN: K-Nearest Neighbors; LASSO: Least Absolute Shrinkage and Selection Operator; LDA: Linear discriminant analysis; LightGBM: Light Gradient Boosting Machine; LinR: Linear regression; LogR: Logistic regression; LOOCV: Leave-One-Out Cross-Validation; MADRS: Montgomery-Asberg Depression Rating Scale; MLM: Multi Level Modeling; MSE: Mean Squared Error; NB: Naive Bayes; NN: Neural Network; NPV: Negative Predictive Value; NR: Not reported; PCC: Pearson correlation coefficient ; PDSS: Panic Disorder Severity Scale; PHQ-9: Patient Health Questionnaire-9; PR: Poisson regression; QDA: Quadratic Discriminant Analysis ; QIDS: Quick Inventory of Depressive Symptomatology; r: correlation coefficient; RAE: Relative Absolute Error; RF: Random Forest; RMSE: Root Mean Square Error; RR: Ridge Regression; R-Squared: Coefficient of determination; SMAPE: Symmetric Mean Absolute Percentage Error; SVM: Support Vector Machine; VR: Voting regressor; XGBoost: extreme gradient boosting; YMRS: Young Mania Rating Scale

| Study <sup>Ref</sup>         | Name of WD                        | Placement of WD            | Aim of AI algorithm      | Problem solving approach   | AI algorithm                            | Dataset source | Data input                                                                                                                                                                      | Ground truth assessment | Validation approach     |
|------------------------------|-----------------------------------|----------------------------|--------------------------|----------------------------|-----------------------------------------|----------------|---------------------------------------------------------------------------------------------------------------------------------------------------------------------------------|-------------------------|-------------------------|
| Adamczyk <sup>1</sup>        | Actiwatch AW4                     | Wrist                      | Detection                | Classification             | LogR, RF, SVM                           | Open           | Activity data                                                                                                                                                                   | MADRS                   | Nested                  |
| Ahmed <sup>2</sup>           | Psychorus                         | Wrist                      | Detection                | Classification             | CB, GB, LogR, KNN, RF, SVC, XGB         | Open           | Activity data, EDA data, heart rate data                                                                                                                                        | BDI-II                  | K-fold                  |
| Aminifar <sup>3</sup>        | Actiwatch AW4                     | Wrist                      | Detection                | Classification             | DT, ERT, ID3, RF, SVM, XGBoost          | Open           | Activity data                                                                                                                                                                   | MADRS                   | LOOCV                   |
| Bai <sup>4</sup>             | Mi Band 2                         | Wrist                      | Detection                | Classification             | DT, LogR, RF, SVM                       | Closed         | Activity data, heart rate data, location, sleep data, smartphone usage data, social interaction                                                                                 | PHQ-9                   | K-fold                  |
| Chikersal <sup>5</sup>       | Fitbit Flex 2                     | Wrist                      | Detection and Prediction | Classification             | AdaBoost, GB, LogR, KNN, LASSO          | Closed         | Activity data, location, sleep data, smartphone usage data, social interaction                                                                                                  | BDI-II                  | LOOCV                   |
| Cho <sup>6</sup>             | Fitbit Charge HR, Fitbit Charge 2 | Wrist                      | Prediction               | Classification             | RF                                      | Closed         | Activity data, heart rate data, light exposure, mood status, sleep data                                                                                                         | DSM-5                   | Hold-out                |
| Choi <sup>7</sup>            | ActiGraph GT3X                    | Ankle, thigh, waist, wrist | Detection                | Classification             | LogR, MLP, SVC, XGBoost                 | Open           | Circadian rhythms                                                                                                                                                               | PHQ-9                   | Hold-out                |
| Choi <sup>8</sup>            | Empatica E4                       | Wrist                      | Detection                | Classification             | DT, GB, KNN, MLP, RF, SVM, XGBoost      | Closed         | Activity data, EDA data, heart rate data, skin temperature                                                                                                                      | GDS, PHQ-9              | K-fold                  |
| Coutts <sup>9</sup>          | Biobeam                           | Wrist                      | Detection                | Classification             | LSTM                                    | Closed         | Heart rate data                                                                                                                                                                 | DASS, STAI              | Hold-out                |
| Dai <sup>10</sup>            | Fitbit Alta HR                    | Wrist                      | Prediction               | Classification             | AdaBoost, ANN, LogR, GBDT, MTL, RF, SVM | Closed         | Activity data, coping, demographic data, depression level, heart rate data, negative problem orientation, post-traumatic stress disorder status, psychiatric status, sleep data | PHQ-9                   | K-fold                  |
| Espino-Salinas <sup>11</sup> | Actiwatch AW4                     | Wrist                      | Detection                | Classification             | CNN                                     | Open           | Activity data                                                                                                                                                                   | MADRS                   | Hold-out, K-fold        |
| Frogner <sup>12</sup>        | Actiwatch AW4                     | Wrist                      | Detection                | Classification, regression | CNN                                     | Open           | Activity data                                                                                                                                                                   | MADRS                   | Hold-out, K-fold, LOOCV |
| Fukuda <sup>13</sup>         | Fitbit Charge 3                   | Wrist                      | Detection                | Classification             | RF                                      | Closed         | Sleep data                                                                                                                                                                      | DAMS                    | LOOCV                   |
| Galvan-Tejada <sup>14</sup>  | Actiwatch AW4                     | Wrist                      | Detection                | Classification             | RF                                      | Open           | Activity data                                                                                                                                                                   | MADRS                   | Hold-out, K-fold        |

|                                    |                                                    |            |            |                            |                                                     |        |                                                                                                                                                                             |                      |                         |
|------------------------------------|----------------------------------------------------|------------|------------|----------------------------|-----------------------------------------------------|--------|-----------------------------------------------------------------------------------------------------------------------------------------------------------------------------|----------------------|-------------------------|
| <b>Garcia-Ceja</b> <sup>15</sup>   | Actiwatch AW4                                      | Wrist      | Detection  | Classification             | AdaBoost, ANN, DT, KNN, GP, NB, QDA, RF, SVM, ZeroR | Closed | Activity data                                                                                                                                                               | MADRS                | K-fold                  |
| <b>Garcia-Ceja</b> <sup>16</sup>   | Actiwatch AW4                                      | Wrist      | Detection  | Classification             | DNN, RF                                             | Open   | Activity data                                                                                                                                                               | MADRS                | LOOCV                   |
| <b>Ghandeharioun</b> <sup>17</sup> | Empatica E4                                        | Wrist      | Detection  | Regression                 | AdaBoost, Ensemble model, GP, LinR, RANSAC, RF, RR  | Closed | Activity data, alcohol, drug, and caffeine consumption, anxiety level, EDA data, location, mood status, sleep data, smartphone usage data, social interaction, stress level | HDRS                 | Hold-out, K-fold, LOOCV |
| <b>Griffiths</b> <sup>18</sup>     | Fitbit                                             | Wrist      | Detection  | Classification             | RF                                                  | Closed | Activity data, sleep data                                                                                                                                                   | PHQ-9                | K-fold                  |
| <b>Horwitz</b> <sup>19</sup>       | Fitbit Charge 4                                    | Wrist      | Prediction | Classification             | elasticNet, RF                                      | Closed | Activity data, mood status, sleep data                                                                                                                                      | PHQ-9                | Nested                  |
| <b>Jacobson</b> <sup>20</sup>      | Actiwatch AW4                                      | Wrist      | Detection  | Classification, regression | XGBoost                                             | Open   | Activity data                                                                                                                                                               | MADRS                | LOOCV                   |
| <b>Jakobsen</b> <sup>21</sup>      | Actiwatch AW4                                      | Wrist      | Detection  | Classification             | CNN, DNN, RF                                        | Open   | Activity data                                                                                                                                                               | MADRS                | LOOCV                   |
| <b>Jin</b> <sup>22</sup>           | NR                                                 | Wrist      | Detection  | Classification             | LSTM                                                | Closed | Activity data, audio data                                                                                                                                                   | BDI-II, STAI         | Hold-out                |
| <b>Jung</b> <sup>23</sup>          | Trigno Avanti Sensor                               | Lower back | Detection  | Classification             | LSTM                                                | Closed | Activity data                                                                                                                                                               | DSM-IV               | K-fold                  |
| <b>Kim</b> <sup>24</sup>           | Actiwatch Spectrum PRO                             | Wrist      | Detection  | Classification             | BT, DT, LogR, RF                                    | Closed | Activity data, depression level, light exposure, sleep data                                                                                                                 | HDRS, GDS            | Hold-out                |
| <b>Kulam</b> <sup>25</sup>         | Actiwatch AW4                                      | Wrist      | Detection  | Classification             | CNN, LSTM                                           | Open   | Activity data                                                                                                                                                               | MADRS                | K-fold                  |
| <b>Kumar</b> <sup>26</sup>         | Actiwatch AW4                                      | Wrist      | Detection  | Classification             | DCNF, CNN, LSTM                                     | Open   | Activity data                                                                                                                                                               | MADRS                | Hold-out                |
| <b>Lee</b> <sup>27</sup>           | Fitbit Charge HR, Fitbit Charge 2, Fitbit Charge 3 | Wrist      | Prediction | Classification             | RF                                                  | Closed | Activity data, heart rate data, light exposure, sleep data                                                                                                                  | Clinician assessment | Hold-out                |
| <b>Llamocca</b> <sup>28</sup>      | GENEActiv                                          | Wrist      | Detection  | Classification             | DT, LogR, RF, SVM                                   | Closed | Activity data, irritability level, motivation level, sleep data                                                                                                             | Clinician assessment | Hold-out                |
| <b>Lu</b> <sup>29</sup>            | Fitbit Charge HR                                   | Wrist      | Detection  | Classification, regression | LASSO, RR                                           | Closed | Activity data, depression level, heart rate data, location, sleep data                                                                                                      | DSM-5, QIDS          | LOOCV                   |
| <b>Mahendran</b> <sup>30</sup>     | Mi Band 3                                          | Wrist      | Detection  | Classification             | Ensemble model, LogR, RF                            | Closed | Activity data, heart rate data, sleep data                                                                                                                                  | HDRS                 | Hold-out, K-fold        |
| <b>Makhmutova</b> <sup>31</sup>    | Fitbit                                             | Wrist      | Detection  | Classification             | Ensemble model, GBDT, LogR, RF, XGBoost             | Closed | Current therapies, demographic data, depression level, health care utilization, lifestyle changes, medical history, sleep data                                              | PHQ-9                | K-fold                  |
| <b>Makhmutova</b> <sup>32</sup>    | Fitbit                                             | Wrist      | Detection  | Classification             | Ensemble model                                      | Closed | Current therapies, demographic data, depression level, health care utilization, lifestyle changes, medical history, sleep data                                              | PHQ-9                | K-fold                  |
| <b>Mallikarjun</b> <sup>33</sup>   | MindWave Mobile                                    | Head       | Detection  | Classification             | CN2 Rule Inducer, NB, RF, DT, SVM                   | Closed | EEG data                                                                                                                                                                    | PHQ-9                | LOOCV                   |
| <b>Minaeva</b> <sup>34</sup>       | ActiCal, GENEActiv                                 | Wrist      | Detection  | Classification             | LogR                                                | Closed | Activity data, behavioural data, circadian rhythms, demographic data, emotional data, sleep data                                                                            | CIDI                 | External validation     |
| <b>Mullick</b> <sup>35</sup>       | Fitbit Inspire HR                                  | Wrist      | Prediction | Regression                 | AdaBoost, RF, XGBoost                               | Closed | Activity data, heart rate data, location, sleep data, smartphone usage data, social interaction                                                                             | PHQ-9                | LOOCV                   |



|                                      |                                   |        |            |                            |                                           |        |                                                                                                                               |                      |                                      |
|--------------------------------------|-----------------------------------|--------|------------|----------------------------|-------------------------------------------|--------|-------------------------------------------------------------------------------------------------------------------------------|----------------------|--------------------------------------|
| <b>Narziev<sup>36</sup></b>          | Gear S3                           | Wrist  | Detection  | Classification             | RF                                        | Closed | Activity data, light exposure, food intake, heart rate data, mood status, sleep data, smartphone use data, social interaction | BDI-II, DSM-5, PHQ-9 | Hold-out, K-fold                     |
| <b>Nguyen<sup>37</sup></b>           | Actiwatch AW4                     | Wrist  | Detection  | Classification             | CNN, Ensemble model                       | Open   | Activity data                                                                                                                 | MADRS                | Hold-out, K-fold                     |
| <b>Nishimura<sup>38</sup></b>        | Fitbit Charge 3                   | Wrist  | Detection  | Classification             | LightGBM                                  | Closed | Activity data, behavioural data, heart rate data, sleep data, weather data                                                    | DAMS                 | K-fold                               |
| <b>Opoku Asare<sup>39</sup></b>      | Oura Ring                         | Finger | Detection  | Classification             | KNN, LogR, RF, SVM, XGBoost               | Closed | Activity data, heart rate data, location, mood status, sleep data, smartphone usage data                                      | DASS                 | Nested, time-series                  |
| <b>Pacheco-Gonzalez<sup>40</sup></b> | Actiwatch AW4                     | Wrist  | Detection  | Classification             | DT, KNN, NB, RF, SVM                      | Open   | Activity data                                                                                                                 | MADRS                | NR                                   |
| <b>Pedrelli<sup>41</sup></b>         | Empatica E4                       | Wrist  | Detection  | Regression                 | Ensemble model                            | Closed | Activity data, EDA data, heart rate data, location, sleep data, smartphone usage data, social interaction, weather data       | HDRS                 | Hold-out, K-fold                     |
| <b>Price<sup>42</sup></b>            | Actiwatch AW4                     | Wrist  | Detection  | Classification             | RF                                        | Open   | Activity data                                                                                                                 | MADRS                | Nested                               |
| <b>Qian<sup>43</sup></b>             | Ruputer                           | Wrist  | Detection  | Classification             | SVM                                       | Closed | Activity data                                                                                                                 | NR                   | Hold-out                             |
| <b>Raihan<sup>44</sup></b>           | Actiwatch AW4                     | Wrist  | Detection  | Classification             | AdaBoost, ANN, RF                         | Open   | Activity data, demographic data                                                                                               | MADRS                | K-fold                               |
| <b>Rodríguez-Ruiz<sup>45</sup></b>   | Actiwatch AW4                     | Wrist  | Detection  | Classification             | RF                                        | Open   | Activity data                                                                                                                 | MADRS                | Hold-out                             |
| <b>Rodríguez-Ruiz<sup>46</sup></b>   | Actiwatch AW4                     | Wrist  | Detection  | Classification             | RF                                        | Open   | Activity data                                                                                                                 | MADRS                | Hold-out                             |
| <b>Rodríguez-Ruiz<sup>47</sup></b>   | Actiwatch AW4                     | Wrist  | Detection  | Classification             | RF                                        | Open   | Activity data                                                                                                                 | BPRS, MADRS          | K-fold                               |
| <b>Rykov<sup>48</sup></b>            | Fitbit Charge HR, Fitbit Charge 2 | Wrist  | Detection  | Classification, regression | XGBoost                                   | Closed | Activity data, circadian rhythms, sleep data                                                                                  | PHQ-9                | K-fold                               |
| <b>Shah<sup>49</sup></b>             | Galaxy watch                      | Wrist  | Detection  | Regression                 | AdaBoost, elasticNet, GB, PR, RF, SVM, VR | Closed | Activity data, anxiety level, depression level, dietary data, heart rate data, sleep data, stress level                       | PHQ-9                | Nested                               |
| <b>Tazawa<sup>50</sup></b>           | Silmee W20                        | Wrist  | Detection  | Classification, regression | XGBoost                                   | Closed | Activity data, heart rate data, skin temperature, sleep data, UV light exposure                                               | HDRS                 | K-fold                               |
| <b>Valenza<sup>51</sup></b>          | PSYCHE                            | Chest  | Detection  | Classification             | MLP                                       | Closed | ECG data                                                                                                                      | DSM-IV, QIDS, YMRS   | Hold-out, K-fold                     |
| <b>Wang<sup>52</sup></b>             | Microsoft Band 2                  | Wrist  | Detection  | Regression                 | LinR, LogR                                | Closed | Activity data, heart rate data, location, sleep data, smartphone usage data, social interaction                               | PHQ-4, PHQ-8         | K-fold                               |
| <b>Xu<sup>53</sup></b>               | Fitbit Flex 2                     | Wrist  | Prediction | Classification             | AdaBoost                                  | Closed | Activity data, location, sleep data, smartphone usage data, social interaction                                                | BDI-II               | External validation, Hold-out, LOOCV |
| <b>Zanella-Calzada<sup>54</sup></b>  | Actiwatch AW4                     | Wrist  | Detection  | Classification             | RF                                        | Open   | Activity data                                                                                                                 | MADRS                | Hold-out                             |

- 1 Adamczyk, J. & Malawski, F. Comparison of Manual and Automated Feature Engineering for Daily Activity Classification in Mental Disorder Diagnosis. *Computing and Informatics* **40**, 850–879-850–879 (2021).
- 2 Ahmed, A. *et al.* Investigating the Feasibility of Assessing Depression Severity and Valence-Arousal with Wearable Sensors Using Discrete Wavelet Transforms and Machine Learning. *Information* **13**, 406 (2022).

- 3 Aminifar, A., Rabbi, F., Pun, V. K. I. & Lamo, Y. Monitoring Motor Activity Data for Detecting Patients' Depression Using Data Augmentation and Privacy-Preserving Distributed Learning. *Annu Int Conf IEEE Eng Med Biol Soc* **2021**, 2163-2169, doi:10.1109/embc46164.2021.9630592 (2021).
- 4 Bai, R. *et al.* Tracking and Monitoring Mood Stability of Patients With Major Depressive Disorder by Machine Learning Models Using Passive Digital Data: Prospective Naturalistic Multicenter Study. *JMIR Mhealth Uhealth* **9**, e24365, doi:10.2196/24365 (2021).
- 5 Chikersal, P. *et al.* Detecting Depression and Predicting its Onset Using Longitudinal Symptoms Captured by Passive Sensing: A Machine Learning Approach With Robust Feature Selection. *ACM Trans. Comput.-Hum. Interact.* **28**, Article 3, doi:10.1145/3422821 (2021).
- 6 Cho, C. H. *et al.* Mood Prediction of Patients With Mood Disorders by Machine Learning Using Passive Digital Phenotypes Based on the Circadian Rhythm: Prospective Observational Cohort Study. *Journal of medical Internet research* **21**, e11029, doi:10.2196/11029 (2019).
- 7 Choi, J. G., Ko, I. & Han, S. Depression Level Classification Using Machine Learning Classifiers Based on Actigraphy Data. *IEEE Access* **9**, 116622-116646, doi:10.1109/ACCESS.2021.3105393 (2021).
- 8 Choi, J. *et al.* Depressed Mood Prediction of Elderly People with a Wearable Band. *Sensors (Basel, Switzerland)* **22**, doi:10.3390/s22114174 (2022).
- 9 Coutts, L. V., Plans, D., Brown, A. W. & Collomosse, J. Deep learning with wearable based heart rate variability for prediction of mental and general health. *J Biomed Inform* **112**, 103610, doi:10.1016/j.jbi.2020.103610 (2020).
- 10 Dai, R. *et al.* Multi-Task Learning for Randomized Controlled Trials: A Case Study on Predicting Depression with Wearable Data. *Proc. ACM Interact. Mob. Wearable Ubiquitous Technol.* **6**, Article 50, doi:10.1145/3534591 (2022).
- 11 Espino-Salinas, C. H. *et al.* Two-Dimensional Convolutional Neural Network for Depression Episodes Detection in Real Time Using Motor Activity Time Series of Depresjon Dataset. **9**, 458 (2022).
- 12 Frogner, J. I. *et al.* in *Proceedings of the 4th International Workshop on Multimedia for Personal Health & Health Care* 9–15 (Association for Computing Machinery, Nice, France, 2019).
- 13 Fukuda, S. *et al.* in *2020 IEEE International Conference on Pervasive Computing and Communications Workshops (PerCom Workshops)*. 1-6.
- 14 Galván-Tejada, C. E. *et al.* Depression Episodes Detection in Unipolar and Bipolar Patients: A Methodology with Feature Extraction and Feature Selection with Genetic Algorithms Using Activity Motion Signal as Information Source. *Mobile Information Systems* **2019**, 8269695, doi:10.1155/2019/8269695 (2019).
- 15 Garcia-Ceja, E. *et al.* in *Proceedings of the 9th ACM Multimedia Systems Conference* 472–477 (Association for Computing Machinery, Amsterdam, Netherlands, 2018).
- 16 Garcia-Ceja, E. *et al.* in *2018 IEEE 31st International Symposium on Computer-Based Medical Systems (CBMS)*. 316-321.
- 17 Ghandeharioun, A. *et al.* in *2017 Seventh International Conference on Affective Computing and Intelligent Interaction (ACII)*. 325-332.
- 18 Griffiths, C. *et al.* Investigation of physical activity, sleep, and mental health recovery in treatment resistant depression (TRD) patients receiving repetitive transcranial magnetic stimulation (rTMS) treatment. *J Affect Disord Rep* **8**, 100337, doi:10.1016/j.jadr.2022.100337 (2022).

- 19 Horwitz, A. G. *et al.* Using machine learning with intensive longitudinal data to predict depression and suicidal ideation among medical interns over time. *Psychol Med*, 1-8, doi:10.1017/s0033291722003014 (2022).
- 20 Jacobson, N. C., Weingarden, H. & Wilhelm, S. Digital biomarkers of mood disorders and symptom change. *npj Digital Medicine* **2**, 3, doi:10.1038/s41746-019-0078-0 (2019).
- 21 Jakobsen, P. *et al.* Applying machine learning in motor activity time series of depressed bipolar and unipolar patients compared to healthy controls. *PLoS One* **15**, e0231995, doi:10.1371/journal.pone.0231995 (2020).
- 22 Jin, J. *et al.* Attention-Block Deep Learning Based Features Fusion in Wearable Social Sensor for Mental Wellbeing Evaluations. *IEEE Access* **8**, 89258-89268, doi:10.1109/ACCESS.2020.2994124 (2020).
- 23 Jung, D., Kim, J. & Mun, K. R. Identifying Depression in the Elderly Using Gait Accelerometry. *Annu Int Conf IEEE Eng Med Biol Soc* **2022**, 4946-4949, doi:10.1109/embc48229.2022.9871877 (2022).
- 24 Kim, H. *et al.* Depression Prediction by Using Ecological Momentary Assessment, Actiwatch Data, and Machine Learning: Observational Study on Older Adults Living Alone. *JMIR Mhealth Uhealth* **7**, e14149, doi:10.2196/14149 (2019).
- 25 Kulam, S. *Time-Series Classification with Uni-Dimensional Convolutional Neural Networks: An Experimental Comparison with Long Short-Term Memory Networks*, (2019).
- 26 Kumar, A., Sangwan, S. R., Arora, A. & Menon, V. G. Depress-DCNF: A deep convolutional neuro-fuzzy model for detection of depression episodes using IoMT. *Applied Soft Computing* **122**, 108863, doi:<https://doi.org/10.1016/j.asoc.2022.108863> (2022).
- 27 Lee, H. J. *et al.* Prediction of impending mood episode recurrence using real-time digital phenotypes in major depression and bipolar disorders in South Korea: a prospective nationwide cohort study. *Psychol Med*, 1-9, doi:10.1017/s0033291722002847 (2022).
- 28 Llamocca, P., López, V., Santos, M. & Čukić, M. Personalized Characterization of Emotional States in Patients with Bipolar Disorder. *Mathematics* **9**, doi:10.3390/math9111174 (2021).
- 29 Lu, J. *et al.* Joint Modeling of Heterogeneous Sensing Data for Depression Assessment via Multi-task Learning. *Proc. ACM Interact. Mob. Wearable Ubiquitous Technol.* **2**, Article 21, doi:10.1145/3191753 (2018).
- 30 Mahendran, N. *et al.* Sensor-Assisted Weighted Average Ensemble Model for Detecting Major Depressive Disorder. *Sensors (Basel, Switzerland)* **19**, doi:10.3390/s19224822 (2019).
- 31 Makhmutova, M. *Predicting changes in depression using person-generated health data* Master degree thesis, Ecole polytechnique fédérale de Lausanne, (2021).
- 32 Makhmutova, M. *et al.* Predicting Changes in Depression Severity Using the PSYCHE-D (Prediction of Severity Change-Depression) Model Involving Person-Generated Health Data: Longitudinal Case-Control Observational Study. *JMIR Mhealth Uhealth* **10**, e34148, doi:10.2196/34148 (2022).
- 33 Mallikarjun, H. M. & Manimegalai, P. Manoglanistara - Emotional Wellness Phases Prediction of Adolescent Female Students by using Brain Waves. *Current Signal Transduction Therapy* **15**, 315-323, doi:10.2174/1574362414666190703151853 (2020).
- 34 Minaeva, O. *et al.* Screening for Depression in Daily Life: Development and External Validation of a Prediction Model Based on Actigraphy and Experience Sampling Method. *Journal of medical Internet research* **22**, e22634, doi:10.2196/22634 (2020).

- 35 Mullick, T., Radovic, A., Shaaban, S. & Doryab, A. Predicting Depression in Adolescents Using Mobile and Wearable Sensors: Multimodal Machine Learning-Based Exploratory Study. *JMIR Form Res* **6**, e35807, doi:10.2196/35807 (2022).
- 36 Narziev, N. *et al.* STDD: Short-Term Depression Detection with Passive Sensing. *Sensors (Basel, Switzerland)* **20**, doi:10.3390/s20051396 (2020).
- 37 Nguyen, D.-K., Chan, C.-L., Li, A.-H. A. & Phan, D.-V. in *2021 5th International Conference on Medical and Health Informatics* 7–12 (Association for Computing Machinery, Kyoto, Japan, 2021).
- 38 Nishimura, Y. *et al.* in *Sensor-and Video-Based Activity and Behavior Computing* 1-26 (Springer, 2022).
- 39 Asare, K. O. *et al.* Mood ratings and digital biomarkers from smartphone and wearable data differentiates and predicts depression status: A longitudinal data analysis. *Pervasive and Mobile Computing* **83**, 101621, doi:<https://doi.org/10.1016/j.pmcj.2022.101621> (2022).
- 40 Pacheco-González, S. L. *et al.* Evaluation of Five Classifiers for Depression Episodes Detection. *Res. Comput. Sci.* **148**, 129-138, doi:10.13053/rcs-148-10-11 (2019).
- 41 Pedrelli, P. *et al.* Monitoring Changes in Depression Severity Using Wearable and Mobile Sensors. *Frontiers in psychiatry* **11**, 584711, doi:10.3389/fpsy.2020.584711 (2020).
- 42 Price, G. D. *et al.* An unsupervised machine learning approach using passive movement data to understand depression and schizophrenia. *Journal of affective disorders* **316**, 132-139, doi:10.1016/j.jad.2022.08.013 (2022).
- 43 Qian, K. *et al.* in *Proceedings of the Third International Symposium on Image Computing and Digital Medicine* 71–75 (Association for Computing Machinery, Xi'an, China, 2019).
- 44 Raihan, M., Bairagi, A. K. & Rahman, S. in *2021 12th International Conference on Computing Communication and Networking Technologies (ICCCNT)*. 1-5.
- 45 Rodríguez-Ruiz, J. G. *et al.* Classification of Depressive Episodes Using Nighttime Data; a Multivariate and Univariate Analysis. *Program. Comput. Softw.* **46**, 689–698, doi:10.1134/s0361768820080198 (2020).
- 46 Rodríguez-Ruiz, J. G. *et al.* Comparison of Night, Day and 24 h Motor Activity Data for the Classification of Depressive Episodes. *Diagnostics (Basel)* **10**, doi:10.3390/diagnostics10030162 (2020).
- 47 Rodríguez-Ruiz, J. G. *et al.* Classification of Depressive and Schizophrenic Episodes Using Night-Time Motor Activity Signal. *Healthcare (Basel)* **10**, doi:10.3390/healthcare10071256 (2022).
- 48 Rykov, Y. *et al.* Digital Biomarkers for Depression Screening With Wearable Devices: Cross-sectional Study With Machine Learning Modeling. *JMIR Mhealth Uhealth* **9**, e24872, doi:10.2196/24872 (2021).
- 49 Shah, R. V. *et al.* Personalized machine learning of depressed mood using wearables. *Translational Psychiatry* **11**, 338, doi:10.1038/s41398-021-01445-0 (2021).
- 50 Tazawa, Y. *et al.* Evaluating depression with multimodal wristband-type wearable device: screening and assessing patient severity utilizing machine-learning. *Heliyon* **6**, e03274, doi:10.1016/j.heliyon.2020.e03274 (2020).
- 51 Valenza, G. *et al.* Characterization of depressive States in bipolar patients using wearable textile technology and instantaneous heart rate variability assessment. *IEEE J Biomed Health Inform* **19**, 263-274, doi:10.1109/jbhi.2014.2307584 (2015).

- 52 Wang, R. *et al.* Tracking Depression Dynamics in College Students Using Mobile Phone and Wearable Sensing. *Proc. ACM Interact. Mob. Wearable Ubiquitous Technol.* **2**, Article 43, doi:10.1145/3191775 (2018).
- 53 Xu, X. *et al.* Leveraging Routine Behavior and Contextually-Filtered Features for Depression Detection among College Students. *Proc. ACM Interact. Mob. Wearable Ubiquitous Technol.* **3**, Article 116, doi:10.1145/3351274 (2019).
- 54 Zanella-Calzada, L. A. *et al.* Feature Extraction in Motor Activity Signal: Towards a Depression Episodes Detection in Unipolar and Bipolar Patients. *Diagnostics (Basel)* **9**, doi:10.3390/diagnostics9010008 (2019).

**Supplementary Table 3: Reviewers' judgments about each domain in "risk of bias" and "applicability concerns" for each included study.** D: Domain; Plus inside a green circle: low risk, Question mark inside yellow circle: Some concerns; Minus inside red circle: high risk.

| Study ID            | Risk of Bias |    |    |    | Applicability Concerns |    |    |
|---------------------|--------------|----|----|----|------------------------|----|----|
|                     | D1           | D2 | D3 | D4 | D1                     | D2 | D3 |
| Adamczyk 2021       | +            | +  | +  | +  | +                      | +  | +  |
| Ahmed 2022          | +            | +  | +  | +  | +                      | +  | +  |
| Aminifar 2021       | ?            | -  | +  | +  | +                      | +  | +  |
| Bai 2021            | +            | ?  | +  | -  | +                      | +  | +  |
| Chikersal 2021      | +            | +  | +  | +  | +                      | +  | +  |
| Cho 2019            | ?            | +  | +  | +  | +                      | +  | +  |
| Choi 2021a          | +            | +  | +  | +  | +                      | +  | +  |
| Choi 2022b          | -            | +  | ?  | -  | -                      | +  | +  |
| Coutts 2020         | +            | +  | +  | -  | +                      | +  | +  |
| Dai 2022            | -            | +  | +  | +  | +                      | +  | +  |
| Espino-Salinas 2022 | -            | +  | +  | +  | +                      | +  | +  |
| Frogner 2019        | ?            | +  | +  | -  | +                      | +  | +  |
| Fukuda 2020         | +            | +  | +  | +  | +                      | +  | +  |
| Galvan-Tejada 2019  | +            | +  | +  | +  | +                      | +  | +  |
| Garcia-Ceja 2018a   | +            | +  | +  | +  | +                      | +  | +  |
| Garcia-Ceja 2018b   | +            | +  | +  | +  | +                      | +  | +  |
| Ghandeharioun 2017  | -            | +  | -  | +  | +                      | +  | +  |
| Griffiths 2022      | -            | +  | +  | +  | +                      | +  | +  |
| Horwitz 2022        | ?            | +  | +  | -  | +                      | +  | +  |
| Jacobson 2019       | -            | +  | +  | +  | +                      | +  | +  |
| Jakobsen 2020       | +            | +  | +  | +  | +                      | +  | +  |
| Jin 2020            | -            | -  | +  | -  | +                      | +  | +  |
| Jung 2022           | -            | +  | ?  | +  | +                      | +  | +  |
| Kim 2019            | -            | +  | +  | -  | +                      | +  | +  |
| Kulam 2019          | +            | +  | +  | +  | +                      | +  | +  |
| Kumar 2022          | -            | +  | +  | +  | +                      | +  | +  |
| Lee 2022            | +            | +  | +  | +  | +                      | +  | +  |

  

|   |               |
|---|---------------|
| + | Low risk      |
| ? | Some concerns |
| - | High risk     |

  

|    |                    |
|----|--------------------|
| D1 | Participant        |
| D2 | Index test         |
| D3 | Reference Standard |
| D4 | Analysis           |



**Supplementary Table 4: Pooled mean estimates of highest accuracy by several factors.** BDI-II: Beck Depression Inventory-II; CI: Confidence interval; DSM: Diagnostic and Statistical Manual of Mental Health; HDRS: Hamilton Depression Rating Scale; MADRS: Montgomery-Asberg Depression Rating Scale; NA: Not applicable; PHQ-9: Patient Health Questionnaire-9; WD: Wearable device

| Groups                       | Number of studies | Sample size | Accuracy (%) | Pooled mean accuracy | Heterogeneity measures |                 |                    | Test for subgroup differences |      |              |
|------------------------------|-------------------|-------------|--------------|----------------------|------------------------|-----------------|--------------------|-------------------------------|------|--------------|
|                              | Total n           | Total N     | Range        | Mean (%) (95% CI)    | Tau <sup>2</sup>       | Q (p-value)     | I <sup>2</sup> (%) | Q (p-value)                   |      |              |
| <b>Algorithms</b>            |                   |             |              |                      |                        |                 |                    |                               |      |              |
| Random forest                | 19                | 105,716     | 0.64-1.00    | 0.85 (0.79-0.90)     |                        | 5119.9 (<0.001) | 99.6               |                               |      |              |
| Logistic regression          | 8                 | 21,353      | 0.56-0.93    | 0.76 (0.68-0.84)     |                        | 603.7 (<0.001)  | 98.8               |                               |      |              |
| XGBoost                      | 7                 | 28,116      | 0.61-0.97    | 0.88 (0.82-0.94)     |                        | 2712.7 (<0.001) | 99.8               |                               |      |              |
| Convolutional neural network | 5                 | 6,131       | 0.76-1.00    | 0.85 (0.74-0.92)     |                        | 374.9 (<0.001)  | 98.9               |                               |      |              |
| Support vector machine       | 4                 | 6,181       | 0.66-0.78    | 0.79 (0.69-0.88)     |                        | 8.9 (0.081)     | 66.2               |                               |      |              |
| Ensemble model               | 4                 | 22,996      | 0.68-0.99    | 0.86 (0.78-0.93)     |                        | 1272.0 (<0.001) | 99.8               |                               |      |              |
| Decision tree                | 3                 | 5,696       | 0.66-0.93    | 0.79 (0.68-0.88)     | 0.04                   | 46.8 (<0.001)   | 95.7               | 37.84 (<0.001)                |      |              |
| Long short-term memory       | 3                 | 1,337       | 0.73-0.96    | 0.85 (0.71-0.95)     |                        | 111.5 (<0.001)  | 98.2               |                               |      |              |
| AdaBoost                     | 2                 | 139         | 0.88-0.98    | 0.99 (0.92-1.00)     |                        | 6.3 (0.173)     | 84.0               |                               |      |              |
| Deep neural network          | 2                 | 104         | 0.71-0.84    | 0.86 (0.72-0.96)     |                        | 2.5 (0.321)     | 59.2               |                               |      |              |
| K-nearest neighbors          | 2                 | 2,141       | 0.58-0.66    | 0.81 (0.70-0.91)     |                        | 2.9 (0.246)     | 65.7               |                               |      |              |
| Gradient boosting            | 2                 | 2,141       | 0.64-0.69    | 0.85 (0.74-0.93)     |                        | 1.2 (0.548)     | 15.9               |                               |      |              |
| Multilayer perceptron        | 2                 | 11,291      | 0.84-1.00    | 0.85 (0.73-0.94)     |                        | 1335.8 (<0.001) | 99.9               |                               |      |              |
| Support vector classifier    | 2                 | 11,192      | 0.60-0.85    | 0.83 (0.73-0.91)     |                        | 524.0 (<0.001)  | 99.8               |                               |      |              |
| <b>Aims of AI</b>            |                   |             |              |                      |                        |                 |                    |                               |      |              |
| Detection                    | 73                | 175,215     | 0.56-1.00    | 0.89 (0.82-0.93)     |                        | 2.6             | 8623.9 (<.001)     |                               | 99.2 | 0.33 (0.567) |
| Prediction                   | 2                 | 73,988      | 0.67-0.90    | 0.81 (0.30-0.98)     | 345.7 (<.001)          |                 | 99.7               |                               |      |              |
| <b>Wearable devices</b>      |                   |             |              |                      |                        |                 |                    |                               |      |              |
| Actiwatch                    | 31                | 53,617      | 0.65-1.00    | 0.91 (0.83-0.96)     |                        | 2083.8 (<0.001) | 98.6               |                               |      |              |
| Fitbit                       | 16                | 140,123     | 0.63-0.92    | 0.80 (0.57-0.92)     | 2.5                    | 4791.6 (<0.001) | 99.7               | 2.17 (0.34)                   |      |              |
| Mi Band 2                    | 7                 | 1,813       | 0.75-0.99    | 0.91 (0.55-0.99)     |                        | 115.9 (<0.001)  | 94.8               |                               |      |              |
| <b>Data sources</b>          |                   |             |              |                      |                        |                 |                    |                               |      |              |
| WD-based                     | 40                | 72,137      | 0.56-1.00    | 0.91 (0.83-0.95)     |                        | 2986.5 (<0.001) | 98.6               |                               |      |              |
| WD-based & self-reported     | 22                | 102,610     | 0.67-0.99    | 0.86 (0.67-0.95)     | 2.8                    | 3738.9 (<0.001) | 99.4               | 1.05 (0.592)                  |      |              |
| WD-based & non-WD based      | 10                | 74,356      | 0.63-0.90    | 0.81 (0.40-0.96)     |                        | 312.5 (<0.001)  | 97.1               |                               |      |              |
| <b>Data types</b>            |                   |             |              |                      |                        |                 |                    |                               |      |              |
| Activity data                | 30                | 54,338      | 0.65-1.00    | 0.91 (0.83-0.96)     |                        | 2159.8 (<0.001) | 98.7               |                               |      |              |
| Activity data & others       | 28                | 91,393      | 0.56-0.99    | 0.85 (0.68-0.93)     | 2.6                    | 7346.5 (<0.001) | 99.6               | 1.07 (0.587)                  |      |              |
| Non-activity data            | 17                | 103,472     | 0.64-1.00    | 0.88 (0.70-0.96)     |                        | 3601.7 (<0.001) | 99.6               |                               |      |              |
| <b>Reference standards</b>   |                   |             |              |                      |                        |                 |                    |                               |      |              |



|                    |           |                |                  |                         |             |                            |             |              |
|--------------------|-----------|----------------|------------------|-------------------------|-------------|----------------------------|-------------|--------------|
| MADRS              | 30        | 52,312         | 0.65-1.00        | 0.91 (0.80-0.96)        |             | 1856.7 (<0.001)            | 98.4        |              |
| PHQ-9              | 19        | 99,948         | 0.68-0.97        | 0.84 (0.58-0.95)        |             | 3483.9 (<0.001)            | 99.5        |              |
| BDI-II             | 12        | 14,750         | 0.56-0.88        | 0.66 (0.16-0.95)        | 3.0         | 79.9 (<0.001)              | 86.2        | 3.60 (0.462) |
| HDRS               | 4         | 1,586          | 0.76-0.99        | 0.92 (0.51-0.99)        |             | 100.4 (<0.001)             | 97.0        |              |
| DSM                | 3         | 4,635          | 0.67-1.00        | 0.97 (0.80-1.00)        |             | 250.0 (<0.001)             | 99.2        |              |
| <b>All studies</b> | <b>75</b> | <b>249,203</b> | <b>0.56-1.00</b> | <b>0.89 (0.83-0.93)</b> | <b>2.55</b> | <b>14657.1 (&lt;0.001)</b> | <b>99.5</b> | <b>NA</b>    |

**Supplementary Table 5: Pooled mean estimates of lowest accuracy by several factors.** BDI-II: Beck Depression Inventory-II; CI: Confidence interval; DSM: Diagnostic and Statistical Manual of Mental Health; MADRS: Montgomery-Asberg Depression Rating Scale; NA: Not applicable; PHQ-9: Patient Health Questionnaire-9; WD: Wearable device

| Groups                       | Number of studies | Sample size   | Accuracy (%)     | Pooled mean accuracy    | Heterogeneity measures |                           |                    | Test for subgroup differences |
|------------------------------|-------------------|---------------|------------------|-------------------------|------------------------|---------------------------|--------------------|-------------------------------|
|                              | Total n           | Total N       | Range            | Mean (%) (95% CI)       | Tau <sup>2</sup>       | Q (p-value)               | I <sup>2</sup> (%) | Q (p-value)                   |
| <b>Algorithms</b>            |                   |               |                  |                         |                        |                           |                    |                               |
| Random forest                | 9                 | 9,094         | 0.61-0.99        | 0.64 (0.55-0.72)        |                        | 2231.2 (<0.001)           | 99.6               |                               |
| Convolutional neural network | 4                 | 1,040         | 0.71-0.77        | 0.70 (0.59-0.81)        |                        | 1.3 (0.535)               | 0.0                |                               |
| Logistic regression          | 4                 | 1,291         | 0.29-0.70        | 0.63 (0.54-0.72)        |                        | 177.2 (<0.001)            | 98.3               |                               |
| Support vector machine       | 3                 | 681           | 0.59-0.75        | 0.67 (0.57-0.78)        |                        | 15.4 (<0.001)             | 87.0               |                               |
| XGBoost                      | 3                 | 1,321         | 0.20-0.74        | 0.55 (0.45-0.64)        | 0.03                   | 317.2 (<0.001)            | 99.4               | 96.55 (<0.001)                |
| Ensemble model               | 3                 | 22,546        | 0.62-0.86        | 0.78 (0.67-0.90)        |                        | 330.4 (<0.001)            | 99.4               |                               |
| Multilayer perceptron        | 2                 | 20,83         | 0.33-0.65        | 0.67 (0.58-0.77)        |                        | 363.6 (<0.001)            | 99.7               |                               |
| Deep neural network          | 2                 | 110           | 0.65-0.67        | 0.65 (0.52-0.78)        |                        | 0.00 (0.980)              | 0.0                |                               |
| AdaBoost                     | 2                 | 157           | 0.76-0.97        | 0.96 (0.83-1.00)        |                        | 17.5 (<0.001)             | 94.3               |                               |
| <b>Wearable devices</b>      |                   |               |                  |                         |                        |                           |                    |                               |
| Actiwatch                    | 18                | 10,451        | 0.62-0.99        | 0.80 (0.70-0.87)        |                        | 907.9 (<0.001)            | 98.1               |                               |
| Fitbit                       | 8                 | 22,816        | 0.45-0.86        | 0.63 (0.45-0.77)        | 0.9                    | 134.4 (<.0001)            | 94.8               | 3.71 (0.054)                  |
| <b>Data sources</b>          |                   |               |                  |                         |                        |                           |                    |                               |
| WD-based                     | 18                | 14,579        | 0.54-0.99        | 0.72 (0.60-0.81)        |                        | 1306.4 (<0.001)           | 98.7               |                               |
| WD-based & self-reported     | 14                | 26,766        | 0.20-0.97        | 0.64 (0.46-0.78)        | 1.0                    | 1556.9 (<0.001)           | 99.2               | 0.84 (0.657)                  |
| WD-based & non-WD based      | 6                 | 879           | 0.45-0.76        | 0.64 (0.33-0.87)        |                        | 42.5 (<0.001)             | 88.2               |                               |
| <b>Data types</b>            |                   |               |                  |                         |                        |                           |                    |                               |
| Activity data                | 16                | 10,731        | 0.59-0.99        | 0.75 (0.62-0.84)        |                        | 1011.4 (<0.001)           | 98.5               |                               |
| Activity data & others       | 15                | 4,194         | 0.45-0.97        | 0.70 (0.55-0.81)        | 0.9                    | 168.2 (<0.001)            | 91.7               | 2.55 (0.279)                  |
| Non-activity data            | 8                 | 27,399        | 0.20-0.72        | 0.57 (0.36-0.75)        |                        | 1551.5 (<0.001)           | 99.5               |                               |
| <b>Reference standards</b>   |                   |               |                  |                         |                        |                           |                    |                               |
| MADRS                        | 17                | 9,138         | 0.62-0.99        | 0.80 (0.68-0.88)        |                        | 849.9 (<0.001)            | 98.1               |                               |
| PHQ-9                        | 10                | 26,402        | 0.20-0.75        | 0.56 (0.37-0.74)        |                        | 1528.4 (<0.001)           | 99.4               | 6.82 (0.078)                  |
| BDI-II                       | 4                 | 2,327         | 0.45-0.76        | 0.56 (0.26-0.82)        | 0.9                    | 18.6 (0.064)              | 83.8               |                               |
| DSM                          | 2                 | 1,690         | 0.61-0.65        | 0.55 (0.24-0.82)        |                        | 91.8 (<0.001)             | 98.9               |                               |
| <b>All studies</b>           | <b>39</b>         | <b>44,846</b> | <b>0.20-0.99</b> | <b>0.70 (0.62-0.78)</b> | <b>0.9</b>             | <b>3322.7 (&lt;0.001)</b> | <b>98.9</b>        | <b>NA</b>                     |

**Supplementary Table 6: Pooled mean estimates of highest sensitivity by several factors.** BDI-II: Beck Depression Inventory-II; CI: Confidence interval; DSM: Diagnostic and Statistical Manual of Mental Health; MADRS: Montgomery-Asberg Depression Rating Scale; NA: Not applicable; PHQ-9: Patient Health Questionnaire-9; WD: Wearable device

| Groups                       | Number of studies | Sample size   | Sensitivity (%)  | Pooled mean sensitivity | Heterogeneity measures |                           |                    | Test for subgroup differences |
|------------------------------|-------------------|---------------|------------------|-------------------------|------------------------|---------------------------|--------------------|-------------------------------|
|                              | Total n           | Total N       | Range            | Mean (%) (95% CI)       | Tau <sup>2</sup>       | Q (p-value)               | I <sup>2</sup> (%) | Q (p-value)                   |
| <b>Algorithms</b>            |                   |               |                  |                         |                        |                           |                    |                               |
| Random forest                | 17                | 19,116        | 0.61-0.99        | 0.79 (0.73-0.85)        |                        | 2971.1 (<0.001)           | 99.5               |                               |
| XGBoost                      | 6                 | 5,799         | 0.65-0.91        | 0.80 (0.74-0.87)        |                        | 350.2 (<0.001)            | 98.6               |                               |
| Logistic regression          | 5                 | 3,435         | 0.60-0.90        | 0.79 (0.72-0.86)        |                        | 149.7 (<0.001)            | 97.3               |                               |
| Convolutional neural network | 4                 | 2,022         | 0.65-0.99        | 0.83 (0.73-0.94)        |                        | 51.4 (<0.001)             | 94.2               |                               |
| Support vector machine       | 4                 | 2,548         | 0.53-0.89        | 0.74 (0.66-0.82)        | 0.02                   | 64.0 (<0.001)             | 95.3               | 24.05 (0.002)                 |
| Ensemble model               | 3                 | 4,771         | 0.55-0.92        | 0.88 (0.80-0.96)        |                        | 750.0 (<0.001)            | 99.7               |                               |
| Decision tree                | 3                 | 2,400         | 0.74-0.92        | 0.70 (0.62-0.78)        |                        | 10.3 (<0.001)             | 80.5               |                               |
| AdaBoost                     | 2                 | 56            | 0.82-1.00        | 0.96 (0.82-1.00)        |                        | 6.2 (0.046)               | 83.8               |                               |
| Deep neural network          | 2                 | 40            | 0.57-0.82        | 0.78 (0.60-0.96)        |                        | 3.5 (0.176)               | 71.2               |                               |
| <b>Aims of AI</b>            |                   |               |                  |                         |                        |                           |                    |                               |
| Detection                    | 56                | 45,943        | 0.53-1.00        | 0.88 (0.80-0.93)        |                        | 2730.6 (<0.001)           | 98.0               |                               |
| Prediction                   | 2                 | 8,226         | 0.61-0.83        | 0.74 (0.27-0.96)        | 2.2                    | 19.4 (<0.001)             | 94.8               | 0.71 (0.400)                  |
| <b>Wearable devices</b>      |                   |               |                  |                         |                        |                           |                    |                               |
| Actiwatch                    | 28                | 21,328        | 0.57-1.00        | 0.90 (0.81-0.95)        |                        | 754.6 (<0.001)            | 96.4               |                               |
| Fitbit                       | 10                | 21,809        | 0.55-0.88        | 0.75 (0.51-0.90)        | 1.8                    | 959.2 (<0.001)            | 99.1               | 2.44 (0.119)                  |
| <b>Data sources</b>          |                   |               |                  |                         |                        |                           |                    |                               |
| WD-based                     | 37                | 31,193        | 0.53-1.00        | 0.90 (0.82-0.95)        |                        | 1889.9 (<0.001)           | 98.1               |                               |
| WD-based & self-reported     | 15                | 14,456        | 0.55-1.00        | 0.77 (0.53-0.91)        | 2.2                    | 819.7 (<0.001)            | 98.3               | 2.20 (0.332)                  |
| WD-based & non-WD based      | 6                 | 8,520         | 0.74-0.90        | 0.84 (0.49-0.97)        |                        | 11.5 (0.083)              | 56.6               |                               |
| <b>Data types</b>            |                   |               |                  |                         |                        |                           |                    |                               |
| Activity data                | 27                | 21,608        | 0.53-0.99        | 0.89 (0.80-0.94)        |                        | 859.9 (<0.001)            | 97.0               |                               |
| Activity data & others       | 20                | 16,370        | 0.60-1.00        | 0.80 (0.59-0.91)        | 2.2                    | 761.7 (<0.001)            | 97.5               | 1.65 (0.437)                  |
| Non-activity data            | 11                | 16,191        | 0.55-1.00        | 0.91 (0.68-0.98)        |                        | 809.9 (<0.001)            | 98.8               |                               |
| <b>Reference standards</b>   |                   |               |                  |                         |                        |                           |                    |                               |
| MADRS                        | 27                | 20,870        | 0.57-1.00        | 0.89 (0.77-0.95)        |                        | 712.6 (<0.001)            | 96.4               |                               |
| PHQ-9                        | 15                | 14,028        | 0.55-0.92        | 0.80 (0.50-0.94)        |                        | 810.1 (<0.001)            | 98.3               |                               |
| BDI-II                       | 8                 | 7,551         | 0.60-0.82        | 0.74 (0.23-0.96)        | 2.6                    | 37.4 (<0.001)             | 81.3               | 3.04 (0.385)                  |
| DSM                          | 3                 | 2,800         | 0.61-1.00        | 0.96 (0.79-1.00)        |                        | 62.9 (<0.001)             | 96.8               |                               |
| <b>All studies</b>           | <b>58</b>         | <b>54,169</b> | <b>0.53-1.00</b> | <b>0.87 (0.79-0.92)</b> | <b>2.1</b>             | <b>2925.3 (&lt;0.001)</b> | <b>98.1</b>        | <b>NA</b>                     |

**Supplementary Table 7: Pooled mean estimates of lowest sensitivity by several factors.** BDI-II: Beck Depression Inventory-II; CI: Confidence interval; DSM: Diagnostic and Statistical Manual of Mental Health; MADRS: Montgomery-Asberg Depression Rating Scale; NA: Not applicable; PHQ-9: Patient Health Questionnaire-9; WD: Wearable device

| Groups                       | Number of studies | Sample size   | Sensitivity (%)  | Pooled mean sensitivity | Heterogeneity measures |                           |                    | Test for subgroup differences |
|------------------------------|-------------------|---------------|------------------|-------------------------|------------------------|---------------------------|--------------------|-------------------------------|
|                              | Total n           | Total N       | Range            | Mean (%) (95% CI)       | Tau <sup>2</sup>       | Q (p-value)               | I <sup>2</sup> (%) | Q (p-value)                   |
| <b>Algorithms</b>            |                   |               |                  |                         |                        |                           |                    |                               |
| Random forest                | 9                 | 3,628         | 0.39-0.98        | 0.58 (0.39-0.76)        |                        | 339.9 (<0.001)            | 97.6               |                               |
| Convolutional neural network | 4                 | 360           | 0.53-0.66        | 0.60 (0.35-0.80)        |                        | 2.9 (0.574)               | 0.0                |                               |
| Logistic regression          | 3                 | 155           | 0.46-0.84        | 0.69 (0.42-0.87)        |                        | 12.8 (0.005)              | 84.4               |                               |
| Ensemble model               | 3                 | 4,771         | 0.20-0.77        | 0.61 (0.33-0.84)        | 1.7                    | 637.8 (<0.001)            | 99.7               | 2.56 (0.862)                  |
| Support vector machine       | 3                 | 248           | 0.29-0.84        | 0.63 (0.36-0.84)        |                        | 42.4 (<0.001)             | 95.3               |                               |
| XGBoost                      | 2                 | 131           | 0.00-0.66        | 0.32 (0.05-0.80)        |                        | 9.6 (0.008)               | 89.6               |                               |
| Deep neural network          | 2                 | 46            | 0.43-0.43        | 0.48 (0.22-0.76)        |                        | 0.00 (1.00)               | 0.0                |                               |
| <b>Wearable devices</b>      |                   |               |                  |                         |                        |                           |                    |                               |
| Actiwatch                    | 17                | 4,095         | 0.43-0.98        | 0.69 (0.52-0.82)        | 1.4                    | 329.3 (<0.001)            | 95.1               | 4.32 (0.038)                  |
| Fitbit                       | 5                 | 4,711         | 0.00-0.66        | 0.35 (0.15-0.62)        |                        | 524.7 (<0.001)            | 99.2               |                               |
| <b>Data sources</b>          |                   |               |                  |                         |                        |                           |                    |                               |
| WD-based                     | 17                | 7,853         | 0.00-0.98        | 0.64 (0.48-0.77)        |                        | 527.7 (<0.001)            | 97.0               |                               |
| WD-based & self-reported     | 9                 | 4,823         | 0.20-0.91        | 0.51 (0.29-0.72)        | 1.3                    | 554.0 (<0.001)            | 98.6               | 1.47 (0.480)                  |
| WD-based & non-WD based      | 4                 | 339           | 0.66-0.84        | 0.73 (0.37-0.93)        |                        | 13.1 (0.001)              | 77.1               |                               |
| <b>Data types</b>            |                   |               |                  |                         |                        |                           |                    |                               |
| Activity data                | 16                | 4,190         | 0.29-0.98        | 0.64 (0.47-0.79)        |                        | 412.8 (<0.001)            | 96.4               |                               |
| Activity data & others       | 11                | 1,794         | 0.00-0.91        | 0.61 (0.40-0.78)        | 1.4                    | 88.6 (<0.001)             | 88.7               | 0.56 (0.755)                  |
| Non-activity data            | 3                 | 7,031         | 0.20-0.79        | 0.50 (0.21-0.79)        |                        | 1413.3 (<0.001)           | 99.9               |                               |
| <b>Reference standards</b>   |                   |               |                  |                         |                        |                           |                    |                               |
| MADRS                        | 16                | 3,631         | 0.43-0.98        | 0.64 (0.49-0.79)        |                        | 913.0 (<0.001)            | 98.4               |                               |
| PHQ-9                        | 6                 | 4,836         | 0.00-0.84        | 0.39 (0.17-0.62)        | 0.05                   | 1125.8 (<0.001)           | 99.6               |                               |
| BDI-II                       | 2                 | 1,103         | 0.63-0.66        | 0.64 (0.31-0.97)        |                        | 0.1 (0.945)               | 0.0                | 3.36 (0.340)                  |
| DSM                          | 2                 | 1,620         | 0.25-0.42        | 0.59 (0.27-0.92)        |                        | 97.5 (<0.001)             | 99.0               |                               |
| <b>All studies</b>           | <b>30</b>         | <b>13,015</b> | <b>0.00-0.98</b> | <b>0.61 (0.49-0.72)</b> | <b>1.3</b>             | <b>2109.6 (&lt;0.001)</b> | <b>98.6</b>        | <b>NA</b>                     |

**Supplementary Table 8: Pooled mean estimates of highest specificity by several factors.** BDI-II: Beck Depression Inventory-II; CI: Confidence interval; DSM: Diagnostic and Statistical Manual of Mental Health; MADRS: Montgomery-Asberg Depression Rating Scale; NA: Not applicable; PHQ-9: Patient Health Questionnaire-9; WD: Wearable device

| Groups                       | Number of studies | Sample size    | Specificity (%)  | Pooled mean specificity | Heterogeneity measures |                            |                    | Test for subgroup differences |
|------------------------------|-------------------|----------------|------------------|-------------------------|------------------------|----------------------------|--------------------|-------------------------------|
|                              | Total n           | Total N        | Range            | Mean (%) (95% CI)       | Tau <sup>2</sup>       | Q (p-value)                | I <sup>2</sup> (%) | Q (p-value)                   |
| <b>Algorithms</b>            |                   |                |                  |                         |                        |                            |                    |                               |
| Random forest                | 16                | 86,012         | 0.60-1.00        | 0.86 (0.80-0.92)        |                        | 7784.3 (<0.001)            | 99.8               |                               |
| XGBoost                      | 6                 | 13,150         | 0.56-1.00        | 0.86 (0.79-0.94)        |                        | 1977.2 (<0.001)            | 99.7               |                               |
| Logistic regression          | 4                 | 9,632          | 0.51-1.00        | 0.80 (0.72-0.87)        |                        | 325.2 (<0.001)             | 99.1               |                               |
| Convolutional neural network | 4                 | 3,775          | 0.81-1.00        | 0.86 (0.76-0.97)        |                        | 24.8 (<0.001)              | 87.9               |                               |
| Support vector machine       | 3                 | 3,559          | 0.60-0.94        | 0.79 (0.71-0.88)        | 3.6                    | 149.8 (<0.001)             | 98.7               | 16.02 (0.042)                 |
| Ensemble model               | 3                 | 17,775         | 0.80-0.98        | 0.84 (0.75-0.93)        |                        | 758.7 (<0.001)             | 99.7               |                               |
| Decision tree                | 2                 | 3,248          | 0.57-0.94        | 0.78 (0.69-0.87)        |                        | 154.3 (<0.001)             | 99.4               |                               |
| AdaBoost                     | 2                 | 86             | 0.96-0.97        | 1.00 (0.87-1.00)        |                        | 0.02 (0.990)               | 0.0                |                               |
| Deep neural network          | 2                 | 64             | 0.84-0.91        | 0.92 (0.78-1.00)        |                        | 0.57 (0.704)               | 0.0                |                               |
| <b>Aims of AI</b>            |                   |                |                  |                         |                        |                            |                    |                               |
| Detection                    | 52                | 91,905         | 0.51-1.00        | 0.94 (0.88-0.97)        |                        | 5572.4 (<0.001)            | 99.1               |                               |
| Prediction                   | 2                 | 65,671         | 0.74-0.91        | 0.84 (0.29-0.99)        | 3.5                    | 139.0 (<0.001)             | 99.3               | 0.57 (0.452)                  |
| <b>Wearable devices</b>      |                   |                |                  |                         |                        |                            |                    |                               |
| Actiwatch                    | 28                | 31,265         | 0.56-1.00        | 0.95 (0.88-0.98)        |                        | 1287.7 (<0.001)            | 97.9               |                               |
| Fitbit                       | 10                | 117,634        | 0.74-1.00        | 0.92 (0.68-0.98)        | 3.9                    | 2603.1 (<0.001)            | 99.7               | 0.35 (0.556)                  |
| <b>Data sources</b>          |                   |                |                  |                         |                        |                            |                    |                               |
| WD-based                     | 37                | 39,267         | 0.51-1.00        | 0.95 (0.89-0.98)        |                        | 1482.6 (<0.001)            | 97.6               |                               |
| WD-based & self-reported     | 15                | 53,035         | 0.69-1.00        | 0.87 (0.61-0.96)        | 3.5                    | 541.2 (<0.001)             | 97.4               | 1.57 (0.456)                  |
| WD-based & non-WD based      | 2                 | 65,274         | 0.91-0.96        | 0.94 (0.52-1.00)        |                        | 1.7 (0.433)                | 40.2               |                               |
| <b>Data types</b>            |                   |                |                  |                         |                        |                            |                    |                               |
| Activity data                | 27                | 31,706         | 0.56-1.00        | 0.95 (0.88-0.98)        |                        | 1360.1 (<0.001)            | 98.1               |                               |
| Activity data & others       | 16                | 72,911         | 0.51-1.00        | 0.89 (0.68-0.97)        | 3.5                    | 5396.5 (<0.001)            | 99.7               | 1.11 (0.573)                  |
| Non-activity data            | 11                | 52,959         | 0.67-1.00        | 0.92 (0.65-0.99)        |                        | 539.2 (<0.001)             | 98.1               |                               |
| <b>Reference standards</b>   |                   |                |                  |                         |                        |                            |                    |                               |
| MADRS                        | 27                | 30,418         | 0.56-1.00        | 0.95 (0.85-0.98)        |                        | 1118.0 (<0.001)            | 97.7               |                               |
| PHQ-9                        | 11                | 52,101         | 0.67-1.00        | 0.92 (0.56-0.99)        |                        | 41.1 (<0.001)              | 83.0               |                               |
| BDI-II                       | 8                 | 6,774          | 0.51-0.96        | 0.84 (0.21-0.99)        | 4.5                    | 475.4 (<0.001)             | 97.9               | 0.73 (0.866)                  |
| DSM                          | 3                 | 1,744          | 0.74-1.00        | 0.96 (0.66-1.00)        |                        | 113.3 (<0.001)             | 98.2               |                               |
| <b>All studies</b>           | <b>54</b>         | <b>157,576</b> | <b>0.51-1.00</b> | <b>0.93 (0.87-0.97)</b> | <b>3.4</b>             | <b>11879.1 (&lt;0.001)</b> | <b>99.6</b>        | <b>NA</b>                     |

**Supplementary Table 9: Pooled mean estimates of lowest specificity by several factors.** BDI-II: Beck Depression Inventory-II; CI: Confidence interval; MADRS: Montgomery-Asberg Depression Rating Scale; NA: Not applicable; PHQ-9: Patient Health Questionnaire-9; WD: Wearable device.

| Groups                       | Number of studies | Sample size   | Specificity (%)  | Pooled mean specificity | Heterogeneity measures |                           |                    | Test for subgroup differences |
|------------------------------|-------------------|---------------|------------------|-------------------------|------------------------|---------------------------|--------------------|-------------------------------|
|                              | Total n           | Total N       | Range            | Mean (%) (95% CI)       | Tau <sup>2</sup>       | Q (p-value)               | I <sup>2</sup> (%) | Q (p-value)                   |
| <b>Algorithms</b>            |                   |               |                  |                         |                        |                           |                    |                               |
| Random forest                | 8                 | 5,433         | 0.42-0.99        | 0.70 (0.60-0.80)        |                        | 1422.2 (<0.001)           | 99.5               |                               |
| Convolutional neural network | 4                 | 679           | 0.78-0.82        | 0.72 (0.60-0.84)        |                        | 1.1 (0.902)               | 0.0                |                               |
| Ensemble model               | 3                 | 17,775        | 0.65-0.90        | 0.80 (0.68-0.92)        |                        | 352.4 (<0.001)            | 99.4               |                               |
| XGBoost                      | 2                 | 166           | 0.57-0.79        | 0.69 (0.45-0.93)        | 0.03                   | 6.7 (0.035)               | 85.0               | 27.23 (<0.001)                |
| Logistic regression          | 2                 | 58            | 0.62-0.74        | 0.61 (0.44-0.79)        |                        | 1.2 (0.548)               | 17.4               |                               |
| Support vector machine       | 2                 | 391           | 0.62-0.87        | 0.72 (0.57-0.88)        |                        | 15.6 (<0.001)             | 93.6               |                               |
| AdaBoost                     | 2                 | 82            | 0.82-0.94        | 0.98 (0.81-1.00)        |                        | 2.9 (0.235)               | 65.4               |                               |
| Deep neural network          | 2                 | 64            | 0.69-0.78        | 0.69 (0.53-0.84)        |                        | 0.73 (0.947)              | 0.0                |                               |
| <b>Wearable devices</b>      |                   |               |                  |                         |                        |                           |                    |                               |
| Actiwatch                    | 17                | 6,277         | 0.59-0.99        | 0.84 (0.74-0.90)        | 0.9                    | 699.9 (<0.001)            | 97.7               | 4.64 (0.031)                  |
| Fitbit                       | 5                 | 17,862        | 0.42-0.82        | 0.63 (0.42-0.80)        |                        | 120.2 (<0.001)            | 96.7               |                               |
| <b>Data sources</b>          |                   |               |                  |                         |                        |                           |                    |                               |
| WD-based                     | 17                | 8,648         | 0.25-0.99        | 0.75 (0.62-0.85)        | 1.4                    | 1745.2 (<0.001)           | 99.1               | 0.57 (0.449)                  |
| WD-based & self-reported     | 9                 | 17,956        | 0.42-0.94        | 0.66 (0.43-0.83)        |                        | 134.9 (<0.001)            | 94.1               |                               |
| <b>Data types</b>            |                   |               |                  |                         |                        |                           |                    |                               |
| Activity data                | 16                | 6,540         | 0.60-0.99        | 0.75 (0.73-0.90)        | 1.0                    | 934.1 (<0.001)            | 98.9               | 16.72 (0.083)                 |
| Activity data & others       | 8                 | 1,808         | 0.40-0.94        | 0.68 (0.45-0.79)        |                        | 104.5 (<0.001)            | 93.3               |                               |
| Non-activity data            | 3                 | 18,306        | 0.25-0.65        | 0.56 (0.26-0.76)        |                        | 562.5 (<0.001)            | 99.6               |                               |
| <b>Reference standards</b>   |                   |               |                  |                         |                        |                           |                    |                               |
| MADRS                        | 16                | 5,428         | 0.59-0.99        | 0.77 (0.73-0.86)        | 0.04                   | 902.0 (<0.001)            | 98.3               | 19.17 (0.101)                 |
| PHQ-9                        | 3                 | 17,270        | 0.57-0.65        | 0.65 (0.49-0.77)        |                        | 2.2 (0.512)               | 10.9               |                               |
| BDI-II                       | 2                 | 1,010         | 0.40-0.82        | 0.61 (0.42-0.76)        |                        | 54.8 (<0.001)             | 98.2               |                               |
| <b>All studies</b>           | <b>27</b>         | <b>26,654</b> | <b>0.25-0.99</b> | <b>0.73 (0.62-0.82)</b> | <b>1.3</b>             | <b>1909.2 (&lt;0.001)</b> | <b>98.6</b>        | <b>NA</b>                     |

**Supplementary Table 10: PRISMA-DTA Checklist.** DTA: diagnostic test accuracy

| Section/topic                   | #  | PRISMA-DTA Checklist Item                                                                                                                                                                                                                                                | Reported on page # |
|---------------------------------|----|--------------------------------------------------------------------------------------------------------------------------------------------------------------------------------------------------------------------------------------------------------------------------|--------------------|
| <b>TITLE / ABSTRACT</b>         |    |                                                                                                                                                                                                                                                                          |                    |
| Title                           | 1  | Identify the report as a systematic review (+/- meta-analysis) of diagnostic test accuracy (DTA) studies.                                                                                                                                                                | 1                  |
| Abstract                        | 2  | Abstract: See PRISMA-DTA for abstracts.                                                                                                                                                                                                                                  | 2                  |
| <b>INTRODUCTION</b>             |    |                                                                                                                                                                                                                                                                          |                    |
| Rationale                       | 3  | Describe the rationale for the review in the context of what is already known.                                                                                                                                                                                           | 4                  |
| Clinical role of index test     | D1 | State the scientific and clinical background, including the intended use and clinical role of the index test, and if applicable, the rationale for minimally acceptable test accuracy (or minimum difference in accuracy for comparative design).                        | 3                  |
| Objectives                      | 4  | Provide an explicit statement of question(s) being addressed in terms of participants, index test(s), and target condition(s).                                                                                                                                           | 4                  |
| <b>METHODS</b>                  |    |                                                                                                                                                                                                                                                                          |                    |
| Protocol and registration       | 5  | Indicate if a review protocol exists, if and where it can be accessed (e.g., Web address), and, if available, provide registration information including registration number.                                                                                            | 5                  |
| Eligibility criteria            | 6  | Specify study characteristics (participants, setting, index test(s), reference standard(s), target condition(s), and study design) and report characteristics (e.g., years considered, language, publication status) used as criteria for eligibility, giving rationale. | 6                  |
| Information sources             | 7  | Describe all information sources (e.g., databases with dates of coverage, contact with study authors to identify additional studies) in the search and date last searched.                                                                                               | 5                  |
| Search                          | 8  | Present full search strategies for all electronic databases and other sources searched, including any limits used, such that they could be repeated.                                                                                                                     | 5                  |
| Study selection                 | 9  | State the process for selecting studies (i.e., screening, eligibility, included in systematic review, and, if applicable, included in the meta-analysis).                                                                                                                | 6                  |
| Data collection process         | 10 | Describe method of data extraction from reports (e.g., piloted forms, independently, in duplicate) and any processes for obtaining and confirming data from investigators.                                                                                               | 6                  |
| Definitions for data extraction | 11 | Provide definitions used in data extraction and classifications of target condition(s), index test(s), reference standard(s) and other characteristics (e.g. study design, clinical setting).                                                                            | 7                  |
| Risk of bias and applicability  | 12 | Describe methods used for assessing risk of bias in individual studies and concerns regarding the applicability to the review question.                                                                                                                                  | 7                  |
| Diagnostic accuracy             | 13 | State the principal diagnostic accuracy measure(s) reported (e.g. sensitivity, specificity) and state the                                                                                                                                                                | 7                  |

|                      |    |                                                                                                                                                                                                                                                                                                                                                                                                                                          |   |
|----------------------|----|------------------------------------------------------------------------------------------------------------------------------------------------------------------------------------------------------------------------------------------------------------------------------------------------------------------------------------------------------------------------------------------------------------------------------------------|---|
| measures             |    | unit of assessment (e.g. per-patient, per-lesion).                                                                                                                                                                                                                                                                                                                                                                                       |   |
| Synthesis of results | 14 | Describe methods of handling data, combining results of studies and describing variability between studies. This could include, but is not limited to: a) handling of multiple definitions of target condition. b) handling of multiple thresholds of test positivity, c) handling multiple index test readers, d) handling of indeterminate test results, e) grouping and comparing tests, f) handling of different reference standards | 8 |



## Supplementary Table 11: Search strategy

Database(s): **Ovid MEDLINE(R) ALL** 1946 to October 03, 2022.

| #  | Searches                              | Results |
|----|---------------------------------------|---------|
| 1  | exp Artificial Intelligence/          | 147056  |
| 2  | "Artificial Intelligence".tw.         | 19111   |
| 3  | exp Machine Learning/                 | 45132   |
| 4  | "Machine Learning".tw.                | 55796   |
| 5  | exp Deep Learning/                    | 11216   |
| 6  | "Deep Learning".tw.                   | 26682   |
| 7  | "supervised learning".tw.             | 3641    |
| 8  | "unsupervised learning".tw.           | 1715    |
| 9  | "reinforcement learning".tw.          | 4214    |
| 10 | "Decision tree".tw.                   | 10101   |
| 11 | "K-Nearest Neighbor".tw.              | 3833    |
| 12 | "Support vector machine".tw.          | 20729   |
| 13 | "Recurrent neural network".tw.        | 3179    |
| 14 | "convolutional neural network".tw.    | 15429   |
| 15 | "Artificial neural network".tw.       | 14226   |
| 16 | "Deep Neural Networks".tw.            | 3037    |
| 17 | "Naïve Bayes".tw.                     | 3       |
| 18 | "Naive Bayes".tw.                     | 2376    |
| 19 | "Fuzzy Logic".tw.                     | 2155    |
| 20 | "K-Means".tw.                         | 5574    |
| 21 | "Random Forest".tw.                   | 13210   |
| 22 | "Long Short-Term Memory Networks".tw. | 138     |
| 23 | autoencoder.tw.                       | 1529    |
| 24 | "boltzmann machine".tw.               | 262     |
| 25 | "deep belief network".tw.             | 252     |
| 26 | "Gradient Boost".tw.                  | 3008    |
| 27 | AdaBoost.tw.                          | 963     |
| 28 | "Multilayer Perceptron".tw.           | 1939    |
| 29 | "Ensemble learning".tw.               | 1147    |
| 30 | exp Wearable Electronic Devices/      | 16804   |
| 31 | wearable*.tw.                         | 19321   |
| 32 | "smart watch".tw.                     | 182     |
| 33 | smartwatch*.tw.                       | 669     |
| 34 | acceleromet*.tw.                      | 19744   |
| 35 | gyroscop*.tw.                         | 2138    |
| 36 | "inertial sensor".tw.                 | 994     |
| 37 | "inertial measurement unit".tw.       | 2192    |
| 38 | "fitness band".tw.                    | 20      |
| 39 | "flexible band".tw.                   | 87      |
| 40 | headband*.tw.                         | 310     |
| 41 | "head band".tw.                       | 72      |
| 42 | wristband*.tw.                        | 630     |
| 43 | "smart insole".tw.                    | 40      |
| 44 | "Smart armband".tw.                   | 1       |
| 45 | bracelet*.tw.                         | 599     |
| 46 | Emotiv.tw.                            | 80      |
| 47 | NeuroSky.tw.                          | 15      |

|    |                                                                                                                                                                                                                                                                                                                                  |         |
|----|----------------------------------------------------------------------------------------------------------------------------------------------------------------------------------------------------------------------------------------------------------------------------------------------------------------------------------|---------|
| 48 | Mindo.tw.                                                                                                                                                                                                                                                                                                                        | 44      |
| 49 | StarLab.tw.                                                                                                                                                                                                                                                                                                                      | 2       |
| 50 | EmSense.tw.                                                                                                                                                                                                                                                                                                                      | 0       |
| 51 | "B-Alert X24".tw.                                                                                                                                                                                                                                                                                                                | 0       |
| 52 | Enobio.tw.                                                                                                                                                                                                                                                                                                                       | 6       |
| 53 | BrainBit.tw.                                                                                                                                                                                                                                                                                                                     | 0       |
| 54 | NeuroSky.tw.                                                                                                                                                                                                                                                                                                                     | 15      |
| 55 | Muse.tw.                                                                                                                                                                                                                                                                                                                         | 568     |
| 56 | OpenBCI.tw.                                                                                                                                                                                                                                                                                                                      | 14      |
| 57 | Neuroelectrics.tw.                                                                                                                                                                                                                                                                                                               | 2       |
| 58 | "G.tec nautilus".tw.                                                                                                                                                                                                                                                                                                             | 0       |
| 59 | BioSemi.tw.                                                                                                                                                                                                                                                                                                                      | 24      |
| 60 | "mBrainTrain".tw.                                                                                                                                                                                                                                                                                                                | 2       |
| 61 | Cognionics.tw.                                                                                                                                                                                                                                                                                                                   | 4       |
| 62 | "CGX QUICK".tw.                                                                                                                                                                                                                                                                                                                  | 0       |
| 63 | Fitbit.tw.                                                                                                                                                                                                                                                                                                                       | 934     |
| 64 | Garmin.tw.                                                                                                                                                                                                                                                                                                                       | 213     |
| 65 | "Misfit shine".tw.                                                                                                                                                                                                                                                                                                               | 23      |
| 66 | "Polar loop".tw.                                                                                                                                                                                                                                                                                                                 | 31      |
| 67 | Jawbone.tw.                                                                                                                                                                                                                                                                                                                      | 804     |
| 68 | Geneactiv.tw.                                                                                                                                                                                                                                                                                                                    | 155     |
| 69 | Empatica.tw.                                                                                                                                                                                                                                                                                                                     | 71      |
| 70 | Amiigo.tw.                                                                                                                                                                                                                                                                                                                       | 0       |
| 71 | Actigraph.tw.                                                                                                                                                                                                                                                                                                                    | 3259    |
| 72 | "Apple Watch".tw.                                                                                                                                                                                                                                                                                                                | 209     |
| 73 | Withings.tw.                                                                                                                                                                                                                                                                                                                     | 58      |
| 74 | Sensewear.tw.                                                                                                                                                                                                                                                                                                                    | 525     |
| 75 | PowerWatch.tw.                                                                                                                                                                                                                                                                                                                   | 0       |
| 76 | "Samsung Galaxy Watch".tw.                                                                                                                                                                                                                                                                                                       | 4       |
| 77 | Airofit.tw.                                                                                                                                                                                                                                                                                                                      | 3       |
| 78 | Amazfit.tw.                                                                                                                                                                                                                                                                                                                      | 5       |
| 79 | VivaLINK.tw.                                                                                                                                                                                                                                                                                                                     | 0       |
| 80 | "Wellue DuoEK".tw.                                                                                                                                                                                                                                                                                                               | 0       |
| 81 | KardiaMobile.tw.                                                                                                                                                                                                                                                                                                                 | 31      |
| 82 | "Philips Biosensor".tw.                                                                                                                                                                                                                                                                                                          | 1       |
| 83 | Biovitals.tw.                                                                                                                                                                                                                                                                                                                    | 4       |
| 84 | exp Mood Disorder/                                                                                                                                                                                                                                                                                                               | 103245  |
| 85 | mood disorder*.tw.                                                                                                                                                                                                                                                                                                               | 230732  |
| 86 | exp Depression/                                                                                                                                                                                                                                                                                                                  | 141189  |
| 87 | depress*.tw.                                                                                                                                                                                                                                                                                                                     | 518893  |
| 88 | exp Stress, Psychological/                                                                                                                                                                                                                                                                                                       | 147280  |
| 89 | stress*.tw.                                                                                                                                                                                                                                                                                                                      | 972389  |
| 90 | exp Psychological Distress/                                                                                                                                                                                                                                                                                                      | 5901    |
| 91 | distress*.tw.                                                                                                                                                                                                                                                                                                                    | 148661  |
| 92 | 1 or 2 or 3 or 4 or 5 or 6 or 7 or 8 or 9 or 10 or 11 or 12 or 13 or 14 or 15 or 16 or 17 or 18 or 19 or 20 or 21 or 22 or 23 or 24 or 25 or 26 or 27 or 28 or 29                                                                                                                                                                | 233142  |
| 93 | 30 or 31 or 32 or 33 or 34 or 35 or 36 or 37 or 38 or 39 or 40 or 41 or 42 or 43 or 44 or 45 or 46 or 47 or 48 or 49 or 50 or 51 or 52 or 53 or 54 or 55 or 56 or 57 or 58 or 59 or 60 or 61 or 62 or 63 or 64 or 65 or 66 or 67 or 68 or 69 or 70 or 71 or 72 or 73 or 74 or 75 or 76 or 77 or 78 or 79 or 80 or 81 or 82 or 83 | 57765   |
| 94 | 84 or 85 or 86 or 87 or 88 or 89 or 90 or 91                                                                                                                                                                                                                                                                                     | 1709010 |
| 95 | 92 and 93 and 94                                                                                                                                                                                                                                                                                                                 | 243     |
| 96 | limit 95 to (english language and yr="2015 -Current")                                                                                                                                                                                                                                                                            | 225     |

Database(s): Embase 1996 to 2022 Week 41.

| #  | Searches                              | Results |
|----|---------------------------------------|---------|
| 1  | exp Artificial Intelligence/          | 60065   |
| 2  | "Artificial Intelligence".tw.         | 22589   |
| 3  | exp Machine Learning/                 | 307253  |
| 4  | "Machine Learning".tw.                | 65455   |
| 5  | exp Deep Learning/                    | 24222   |
| 6  | "Deep Learning".tw.                   | 30305   |
| 7  | "supervised learning".tw.             | 4168    |
| 8  | "unsupervised learning".tw.           | 1992    |
| 9  | "reinforcement learning".tw.          | 4871    |
| 10 | "Decision tree".tw.                   | 14273   |
| 11 | "K-Nearest Neighbor*".tw.             | 4679    |
| 12 | "Support vector machine*".tw.         | 25140   |
| 13 | "Recurrent neural network*".tw.       | 3588    |
| 14 | "convolutional neural network*".tw.   | 18175   |
| 15 | "Artificial neural network*".tw.      | 16577   |
| 16 | "Deep Neural Networks".tw.            | 3396    |
| 17 | "Naïve Bayes".tw.                     | 17      |
| 18 | "Naive Bayes".tw.                     | 3021    |
| 19 | "Fuzzy Logic".tw.                     | 2679    |
| 20 | "K-Means".tw.                         | 7642    |
| 21 | "Random Forest".tw.                   | 16726   |
| 22 | "Long Short-Term Memory Networks".tw. | 308     |
| 23 | autoencoder.tw.                       | 1838    |
| 24 | "boltzmann machine".tw.               | 464     |
| 25 | "deep belief network".tw.             | 458     |
| 26 | "Gradient Boost*".tw.                 | 3835    |
| 27 | AdaBoost.tw.                          | 1324    |
| 28 | "Multilayer Perceptron".tw.           | 2237    |
| 29 | "Ensemble learning".tw.               | 1474    |
| 30 | exp Wearable Electronic Devices/      | 6513    |
| 31 | wearable*.tw.                         | 21167   |
| 32 | "smart watch*".tw.                    | 261     |
| 33 | smartwatch*.tw.                       | 928     |
| 34 | acceleromet*.tw.                      | 24388   |
| 35 | gyroscop*.tw.                         | 2214    |
| 36 | "inertial sensor".tw.                 | 1232    |
| 37 | "inertial measurement unit*".tw.      | 2475    |
| 38 | "fitness band*".tw.                   | 24      |
| 39 | "flexible band*".tw.                  | 268     |
| 40 | headband*.tw.                         | 518     |
| 41 | "head band*".tw.                      | 90      |
| 42 | wristband*.tw.                        | 1024    |
| 43 | "smart insole*".tw.                   | 180     |
| 44 | "Smart armband".tw.                   | 1       |
| 45 | bracelet*.tw.                         | 936     |
| 46 | Emotiv.tw.                            | 191     |
| 47 | NeuroSky.tw.                          | 149     |

|    |                                                                                                                                                                                                                                                                                                                                  |         |
|----|----------------------------------------------------------------------------------------------------------------------------------------------------------------------------------------------------------------------------------------------------------------------------------------------------------------------------------|---------|
| 48 | Mindo.tw.                                                                                                                                                                                                                                                                                                                        | 146     |
| 49 | StarLab.tw.                                                                                                                                                                                                                                                                                                                      | 6       |
| 50 | EmSense.tw.                                                                                                                                                                                                                                                                                                                      | 0       |
| 51 | "B-Alert X24".tw.                                                                                                                                                                                                                                                                                                                | 0       |
| 52 | Enobio.tw.                                                                                                                                                                                                                                                                                                                       | 14      |
| 53 | BrainBit.tw.                                                                                                                                                                                                                                                                                                                     | 0       |
| 54 | NeuroSky.tw.                                                                                                                                                                                                                                                                                                                     | 18      |
| 55 | Muse.tw.                                                                                                                                                                                                                                                                                                                         | 1223    |
| 56 | OpenBCI.tw.                                                                                                                                                                                                                                                                                                                      | 21      |
| 57 | Neuroelectrics.tw.                                                                                                                                                                                                                                                                                                               | 42      |
| 58 | "G.tec nautilus".tw.                                                                                                                                                                                                                                                                                                             | 0       |
| 59 | BioSemi.tw.                                                                                                                                                                                                                                                                                                                      | 95      |
| 60 | "mBrainTrain".tw.                                                                                                                                                                                                                                                                                                                | 1       |
| 61 | Cognionics.tw.                                                                                                                                                                                                                                                                                                                   | 8       |
| 62 | "CGX QUICK".tw.                                                                                                                                                                                                                                                                                                                  | 0       |
| 63 | Fitbit.tw.                                                                                                                                                                                                                                                                                                                       | 1473    |
| 64 | Garmin.tw.                                                                                                                                                                                                                                                                                                                       | 300     |
| 65 | "Misfit shine".tw.                                                                                                                                                                                                                                                                                                               | 17      |
| 66 | "Polar loop".tw.                                                                                                                                                                                                                                                                                                                 | 28      |
| 67 | Jawbone.tw.                                                                                                                                                                                                                                                                                                                      | 825     |
| 68 | Geneactiv.tw.                                                                                                                                                                                                                                                                                                                    | 216     |
| 69 | Empatica.tw.                                                                                                                                                                                                                                                                                                                     | 83      |
| 70 | Amiigo.tw.                                                                                                                                                                                                                                                                                                                       | 3       |
| 71 | Actigraph.tw.                                                                                                                                                                                                                                                                                                                    | 4977    |
| 72 | "Apple Watch".tw.                                                                                                                                                                                                                                                                                                                | 319     |
| 73 | Withings.tw.                                                                                                                                                                                                                                                                                                                     | 91      |
| 74 | Sensewear.tw.                                                                                                                                                                                                                                                                                                                    | 1075    |
| 75 | PowerWatch.tw.                                                                                                                                                                                                                                                                                                                   | 0       |
| 76 | "Samsung Galaxy Watch".tw.                                                                                                                                                                                                                                                                                                       | 4       |
| 77 | Airofit.tw.                                                                                                                                                                                                                                                                                                                      | 1       |
| 78 | Amazfit.tw.                                                                                                                                                                                                                                                                                                                      | 6       |
| 79 | VivaLINK.tw.                                                                                                                                                                                                                                                                                                                     | 1       |
| 80 | "Wellue DuoEK".tw.                                                                                                                                                                                                                                                                                                               | 0       |
| 81 | KardiaMobile.tw.                                                                                                                                                                                                                                                                                                                 | 52      |
| 82 | "Philips Biosensor".tw.                                                                                                                                                                                                                                                                                                          | 2       |
| 83 | Biovitals.tw.                                                                                                                                                                                                                                                                                                                    | 3       |
| 84 | exp Mood Disorder/                                                                                                                                                                                                                                                                                                               | 225092  |
| 85 | mood disorder*.tw.                                                                                                                                                                                                                                                                                                               | 299011  |
| 86 | exp Depression/                                                                                                                                                                                                                                                                                                                  | 491389  |
| 87 | depress*.tw.                                                                                                                                                                                                                                                                                                                     | 575158  |
| 88 | exp Stress, Psychological/                                                                                                                                                                                                                                                                                                       | 161707  |
| 89 | stress*.tw.                                                                                                                                                                                                                                                                                                                      | 1094813 |
| 90 | exp Psychological Distress/                                                                                                                                                                                                                                                                                                      | 53522   |
| 91 | distress*.tw.                                                                                                                                                                                                                                                                                                                    | 184648  |
| 92 | 1 or 2 or 3 or 4 or 5 or 6 or 7 or 8 or 9 or 10 or 11 or 12 or 13 or 14 or 15 or 16 or 17 or 18 or 19 or 20 or 21 or 22 or 23 or 24 or 25 or 26 or 27 or 28 or 29                                                                                                                                                                | 372011  |
| 93 | 30 or 31 or 32 or 33 or 34 or 35 or 36 or 37 or 38 or 39 or 40 or 41 or 42 or 43 or 44 or 45 or 46 or 47 or 48 or 49 or 50 or 51 or 52 or 53 or 54 or 55 or 56 or 57 or 58 or 59 or 60 or 61 or 62 or 63 or 64 or 65 or 66 or 67 or 68 or 69 or 70 or 71 or 72 or 73 or 74 or 75 or 76 or 77 or 78 or 79 or 80 or 81 or 82 or 83 | 59418   |
| 94 | 84 or 85 or 86 or 87 or 88 or 89 or 90 or 91                                                                                                                                                                                                                                                                                     | 2046432 |
| 95 | 92 and 93 and 94                                                                                                                                                                                                                                                                                                                 | 353     |

|    |                                                       |     |
|----|-------------------------------------------------------|-----|
| 96 | limit 95 to (english language and yr="2015 -Current") | 315 |
| 97 | limit 96 to exclude medline journals                  | 68  |

Database(s): **APA PsycInfo** 2002 to October Week 1 2022.

| #  | Searches                              | Results |
|----|---------------------------------------|---------|
| 1  | exp Artificial Intelligence/          | 23781   |
| 2  | "Artificial Intelligence".tw.         | 5106    |
| 3  | exp Machine Learning/                 | 12327   |
| 4  | "Machine Learning".tw.                | 9660    |
| 5  | exp Deep Learning/                    | 0       |
| 6  | "Deep Learning".tw.                   | 2682    |
| 7  | "supervised learning".tw.             | 1105    |
| 8  | "unsupervised learning".tw.           | 728     |
| 9  | "reinforcement learning".tw.          | 3117    |
| 10 | "Decision tree".tw.                   | 1395    |
| 11 | "K-Nearest Neighbor*".tw.             | 577     |
| 12 | "Support vector machine*".tw.         | 3176    |
| 13 | "Recurrent neural network*".tw.       | 1081    |
| 14 | "convolutional neural network*".tw.   | 1237    |
| 15 | "Artificial neural network*".tw.      | 2025    |
| 16 | "Deep Neural Networks".tw.            | 647     |
| 17 | "Naïve Bayes".tw.                     | 7       |
| 18 | "Naive Bayes".tw.                     | 605     |
| 19 | "Fuzzy Logic".tw.                     | 846     |
| 20 | "K-Means".tw.                         | 1536    |
| 21 | "Random Forest".tw.                   | 1111    |
| 22 | "Long Short-Term Memory Networks".tw. | 27      |
| 23 | autoencoder.tw.                       | 328     |
| 24 | "boltzmann machine".tw.               | 134     |
| 25 | "deep belief network".tw.             | 65      |
| 26 | "Gradient Boost*".tw.                 | 215     |
| 27 | AdaBoost.tw.                          | 341     |
| 28 | "Multilayer Perceptron".tw.           | 118     |
| 29 | "Ensemble learning".tw.               | 152     |
| 30 | exp Wearable Electronic Devices/      | 0       |
| 31 | wearable*.tw.                         | 2008    |
| 32 | "smart watch*".tw.                    | 45      |
| 33 | smartwatch*.tw.                       | 145     |
| 34 | acceleromet*.tw.                      | 4211    |
| 35 | gyroscop*.tw.                         | 108     |
| 36 | "inertial sensor".tw.                 | 53      |
| 37 | "inertial measurement unit*".tw.      | 132     |
| 38 | "fitness band*".tw.                   | 2       |
| 39 | "flexible band*".tw.                  | 2       |
| 40 | headband*.tw.                         | 53      |
| 41 | "head band*".tw.                      | 3       |
| 42 | wristband*.tw.                        | 121     |
| 43 | "smart insole*".tw.                   | 1       |
| 44 | "Smart armband".tw.                   | 0       |
| 45 | bracelet*.tw.                         | 96      |

|    |                                                                                                                                                                                                                                                                                                                                  |        |
|----|----------------------------------------------------------------------------------------------------------------------------------------------------------------------------------------------------------------------------------------------------------------------------------------------------------------------------------|--------|
| 46 | Emotiv.tw.                                                                                                                                                                                                                                                                                                                       | 28     |
| 47 | NeuroSky.tw.                                                                                                                                                                                                                                                                                                                     | 13     |
| 48 | Mindo.tw.                                                                                                                                                                                                                                                                                                                        | 0      |
| 49 | StarLab.tw.                                                                                                                                                                                                                                                                                                                      | 1      |
| 50 | EmSense.tw.                                                                                                                                                                                                                                                                                                                      | 0      |
| 51 | "B-Alert X24".tw.                                                                                                                                                                                                                                                                                                                | 0      |
| 52 | Enobio.tw.                                                                                                                                                                                                                                                                                                                       | 2      |
| 53 | BrainBit.tw.                                                                                                                                                                                                                                                                                                                     | 0      |
| 54 | NeuroSky.tw.                                                                                                                                                                                                                                                                                                                     | 13     |
| 55 | Muse.tw.                                                                                                                                                                                                                                                                                                                         | 301    |
| 56 | OpenBCI.tw.                                                                                                                                                                                                                                                                                                                      | 2      |
| 57 | Neuroelectrics.tw.                                                                                                                                                                                                                                                                                                               | 1      |
| 58 | "G.tec nautilus".tw.                                                                                                                                                                                                                                                                                                             | 0      |
| 59 | BioSemi.tw.                                                                                                                                                                                                                                                                                                                      | 15     |
| 60 | "mBrainTrain".tw.                                                                                                                                                                                                                                                                                                                | 0      |
| 61 | Cognionics.tw.                                                                                                                                                                                                                                                                                                                   | 1      |
| 62 | "CGX QUICK".tw.                                                                                                                                                                                                                                                                                                                  | 0      |
| 63 | Fitbit.tw.                                                                                                                                                                                                                                                                                                                       | 245    |
| 64 | Garmin.tw.                                                                                                                                                                                                                                                                                                                       | 28     |
| 65 | "Misfit shine".tw.                                                                                                                                                                                                                                                                                                               | 4      |
| 66 | "Polar loop".tw.                                                                                                                                                                                                                                                                                                                 | 1      |
| 67 | Jawbone.tw.                                                                                                                                                                                                                                                                                                                      | 23     |
| 68 | Geneactiv.tw.                                                                                                                                                                                                                                                                                                                    | 21     |
| 69 | Empatica.tw.                                                                                                                                                                                                                                                                                                                     | 56     |
| 70 | Amiigo.tw.                                                                                                                                                                                                                                                                                                                       | 0      |
| 71 | Actigraph.tw.                                                                                                                                                                                                                                                                                                                    | 1076   |
| 72 | "Apple Watch".tw.                                                                                                                                                                                                                                                                                                                | 31     |
| 73 | Withings.tw.                                                                                                                                                                                                                                                                                                                     | 7      |
| 74 | Sensewear.tw.                                                                                                                                                                                                                                                                                                                    | 98     |
| 75 | PowerWatch.tw.                                                                                                                                                                                                                                                                                                                   | 0      |
| 76 | "Samsung Galaxy Watch".tw.                                                                                                                                                                                                                                                                                                       | 0      |
| 77 | Airofit.tw.                                                                                                                                                                                                                                                                                                                      | 0      |
| 78 | Amazfit.tw.                                                                                                                                                                                                                                                                                                                      | 1      |
| 79 | VivaLINK.tw.                                                                                                                                                                                                                                                                                                                     | 0      |
| 80 | "Wellue DuoEK".tw.                                                                                                                                                                                                                                                                                                               | 0      |
| 81 | KardiaMobile.tw.                                                                                                                                                                                                                                                                                                                 | 1      |
| 82 | "Philips Biosensor".tw.                                                                                                                                                                                                                                                                                                          | 0      |
| 83 | Biovitals.tw.                                                                                                                                                                                                                                                                                                                    | 0      |
| 84 | exp Mood Disorder/                                                                                                                                                                                                                                                                                                               | 55645  |
| 85 | mood disorder*.tw.                                                                                                                                                                                                                                                                                                               | 155082 |
| 86 | exp Depression/                                                                                                                                                                                                                                                                                                                  | 9914   |
| 87 | depress*.tw.                                                                                                                                                                                                                                                                                                                     | 241746 |
| 88 | exp Stress, Psychological/                                                                                                                                                                                                                                                                                                       | 0      |
| 89 | stress*.tw.                                                                                                                                                                                                                                                                                                                      | 209395 |
| 90 | exp Psychological Distress/                                                                                                                                                                                                                                                                                                      | 0      |
| 91 | distress*.tw.                                                                                                                                                                                                                                                                                                                    | 66195  |
| 92 | 1 or 2 or 3 or 4 or 5 or 6 or 7 or 8 or 9 or 10 or 11 or 12 or 13 or 14 or 15 or 16 or 17 or 18 or 19 or 20 or 21 or 22 or 23 or 24 or 25 or 26 or 27 or 28 or 29                                                                                                                                                                | 36989  |
| 93 | 30 or 31 or 32 or 33 or 34 or 35 or 36 or 37 or 38 or 39 or 40 or 41 or 42 or 43 or 44 or 45 or 46 or 47 or 48 or 49 or 50 or 51 or 52 or 53 or 54 or 55 or 56 or 57 or 58 or 59 or 60 or 61 or 62 or 63 or 64 or 65 or 66 or 67 or 68 or 69 or 70 or 71 or 72 or 73 or 74 or 75 or 76 or 77 or 78 or 79 or 80 or 81 or 82 or 83 | 7423   |

|    |                                                       |        |
|----|-------------------------------------------------------|--------|
| 94 | 84 or 85 or 86 or 87 or 88 or 89 or 90 or 91          | 506879 |
| 95 | 92 and 93 and 94                                      | 53     |
| 96 | limit 95 to (english language and yr="2015 -Current") | 42     |

**CINHAL:** Monday, October 3, 2022 4:10:26 PM

| #   | Query                                                                                                                                                                                                                                                                                                                                          | Results |
|-----|------------------------------------------------------------------------------------------------------------------------------------------------------------------------------------------------------------------------------------------------------------------------------------------------------------------------------------------------|---------|
| S91 | Narrow by Language: - english                                                                                                                                                                                                                                                                                                                  | 29      |
| S90 | Limiters - Date Published: 20150101-20221231                                                                                                                                                                                                                                                                                                   | 29      |
| S89 | S86 AND S87 AND S88                                                                                                                                                                                                                                                                                                                            | 29      |
| S88 | (S78 OR S79 OR S80 OR S81 OR S82 OR S83 OR S84 OR S85)                                                                                                                                                                                                                                                                                         | 487,103 |
| S87 | (S30 OR S31 OR S32 OR S33 OR S34 OR S35 OR S36 OR S37 OR S38 OR S39 OR S40 OR S41 OR S42 OR S43 OR S44 OR S45 OR S46 OR S47 OR S48 OR S49 OR S50 OR S51 OR S52 OR S53 OR S54 OR S55 OR S56 OR S57 OR S58 OR S59 OR S60 OR S61 OR S62 OR S63 OR S64 OR S65 OR S66 OR S67 OR S68 OR S69 OR S70 OR S71 OR S72 OR S73 OR S74 OR S75 OR S76 OR S77) | 13,841  |
| S86 | (S1 OR S2 OR S3 OR S4 OR S5 OR S6 OR S7 OR S8 OR S9 OR S10 OR S11 OR S12 OR S13 OR S14 OR S15 OR S16 OR S17 OR S18 OR S19 OR S20 OR S21 OR S22 OR S23 OR S24 OR S25 OR S26 OR S27 OR S28 OR S29)                                                                                                                                               | 25,112  |
| S85 | AB distress                                                                                                                                                                                                                                                                                                                                    | 53,231  |
| S84 | MW distress                                                                                                                                                                                                                                                                                                                                    | 18,307  |
| S83 | AB stress                                                                                                                                                                                                                                                                                                                                      | 142,755 |
| S82 | MW stress                                                                                                                                                                                                                                                                                                                                      | 154,999 |
| S81 | AB depress*                                                                                                                                                                                                                                                                                                                                    | 148,574 |
| S80 | MW depression                                                                                                                                                                                                                                                                                                                                  | 138,522 |
| S79 | AB Mood Disorder*                                                                                                                                                                                                                                                                                                                              | 87,122  |
| S78 | MW Mood Disorder                                                                                                                                                                                                                                                                                                                               | 69,864  |
| S77 | AB Biovitals                                                                                                                                                                                                                                                                                                                                   | 2       |
| S76 | AB "Philips Biosensor"                                                                                                                                                                                                                                                                                                                         | 0       |
| S75 | AB KardiaMobile                                                                                                                                                                                                                                                                                                                                | 13      |
| S74 | AB "Wellue DuoEK"                                                                                                                                                                                                                                                                                                                              | 0       |
| S73 | AB VivaLINK                                                                                                                                                                                                                                                                                                                                    | 0       |
| S72 | AB Amazfit                                                                                                                                                                                                                                                                                                                                     | 1       |
| S71 | AB Airofit                                                                                                                                                                                                                                                                                                                                     | 0       |
| S70 | AB "Samsung Galaxy Watch"                                                                                                                                                                                                                                                                                                                      | 2       |

|     |                       |       |
|-----|-----------------------|-------|
| S69 | AB PowerWatch         | 1     |
| S68 | AB Sensewear          | 237   |
| S67 | AB Withings           | 43    |
| S66 | AB "Apple Watch"      | 115   |
| S65 | AB Actigraph          | 1,779 |
| S64 | AB Amiigo             | 0     |
| S63 | AB Empatica           | 74    |
| S62 | AB Geneactiv          | 87    |
| S61 | AB Jawbone            | 230   |
| S60 | AB "Polar loop"       | 5     |
| S59 | AB "Misfit shine"     | 9     |
| S58 | AB Garmin             | 92    |
| S57 | AB Garmin             | 0     |
| S56 | AB Fitbit             | 459   |
| S55 | AB "CGX QUICK"        | 0     |
| S54 | AB Cognionics         | 0     |
| S53 | AB "mBrainTrain"      | 0     |
| S52 | AB BioSemi            | 4     |
| S51 | AB "G.tec nautilus"   | 0     |
| S50 | AB Neuroelectronics   | 46    |
| S49 | AB Mindo              | 0     |
| S48 | AB NeuroSky           | 3     |
| S47 | AB Emotiv             | 12    |
| S46 | AB bracelet*          | 254   |
| S45 | AB "armband**"        | 280   |
| S44 | AB "Smart armband**"  | 0     |
| S43 | AB "smart headband**" | 0     |
| S42 | AB "smart insole**"   | 1     |
| S41 | AB wristband*         | 248   |
| S40 | AB "head band**"      | 21    |



|     |                                      |       |
|-----|--------------------------------------|-------|
| S39 | AB headband*                         | 102   |
| S38 | AB "fitness band**"                  | 12    |
| S37 | AB "inertial measurement unit**"     | 418   |
| S36 | AB "inertial sensor"                 | 196   |
| S35 | AB gyroskop                          | 0     |
| S34 | AB acceleromet*                      | 7,796 |
| S33 | AB smartwatch*                       | 189   |
| S32 | AB "smart watch**"                   | 59    |
| S31 | AB wearable*                         | 3,069 |
| S30 | MW wearable devices                  | 91    |
| S29 | AB "Ensemble learning"               | 103   |
| S28 | AB "Multilayer Perceptron"           | 195   |
| S27 | AB AdaBoost                          | 131   |
| S26 | AB "Gradient Boost**"                | 564   |
| S25 | AB "deep belief network"             | 24    |
| S24 | AB "boltzmann machine"               | 10    |
| S23 | AB autoencoder                       | 93    |
| S22 | AB "Long Short-Term Memory Networks" | 15    |
| S21 | AB "Random Forest"                   | 2,006 |
| S20 | AB "K-Means"                         | 972   |
| S19 | AB "Fuzzy Logic"                     | 207   |
| S18 | AB "Naive Bayes"                     | 175   |
| S17 | AB "Naïve Bayes"                     | 256   |
| S16 | AB "Deep Neural Networks"            | 147   |
| S15 | AB "Artificial neural network**"     | 1,195 |
| S14 | AB "convolutional neural network**"  | 1,359 |
| S13 | AB "Recurrent neural network**"      | 182   |
| S12 | AB "Support vector machine**"        | 2,429 |
| S11 | AB "K-Nearest Neighbor**"            | 412   |
| S10 | AB "Decision tree"                   | 2,352 |

|    |                              |       |
|----|------------------------------|-------|
| S9 | AB "reinforcement learning"  | 272   |
| S8 | AB "unsupervised learning"   | 107   |
| S7 | AB "supervised learning"     | 250   |
| S6 | AB "deep Learning"           | 2,688 |
| S5 | MW "deep Learning"           | 999   |
| S4 | AB "Machine Learning"        | 7,913 |
| S3 | MW "Machine Learning"        | 3,155 |
| S2 | AB "Artificial Intelligence" | 4,314 |
| S1 | MW Artificial Intelligence   | 7,059 |

| Database | Query                                                                                                                                                                                                                                                                                                                                                                                                                                                                                                                                                                                                                                                                                                                                                                                                                                                                                                                                                                                                                                                                                                                                                                                                                                                                                                                                                                                                                                                                                                                                                                                                                                                                                                                                                                                                                                                                                                                                                       | Results |
|----------|-------------------------------------------------------------------------------------------------------------------------------------------------------------------------------------------------------------------------------------------------------------------------------------------------------------------------------------------------------------------------------------------------------------------------------------------------------------------------------------------------------------------------------------------------------------------------------------------------------------------------------------------------------------------------------------------------------------------------------------------------------------------------------------------------------------------------------------------------------------------------------------------------------------------------------------------------------------------------------------------------------------------------------------------------------------------------------------------------------------------------------------------------------------------------------------------------------------------------------------------------------------------------------------------------------------------------------------------------------------------------------------------------------------------------------------------------------------------------------------------------------------------------------------------------------------------------------------------------------------------------------------------------------------------------------------------------------------------------------------------------------------------------------------------------------------------------------------------------------------------------------------------------------------------------------------------------------------|---------|
| Scopus   | ( TITLE-ABS-KEY ( "Artificial Intelligence" OR "Machine Learning" OR "Deep Learning" OR "supervised learning" OR "unsupervised learning" OR "reinforcement learning" OR "Decision tree" OR "K-Nearest Neighbor*" OR "Support vector machine*" OR "Recurrent neural network*" OR "convolutional neural network*" OR "Artificial neural network*" OR "Deep Neural Networks" OR "Naïve Bayes" OR "Naive Bayes" OR "Fuzzy Logic" OR "K-Means" OR "Random Forest" OR "Long Short-Term Memory Networks" OR autoencoder OR "boltzmann machine" OR "deep belief network" OR "Gradient Boost*" OR adaboost OR "Multilayer Perceptron" OR "Ensemble learning" )) AND ( TITLE-ABS-KEY ( wearable* OR "smart watch*" OR smartwatch* OR acceleromet* OR gyroscop* OR "inertial sensor" OR "inertial measurement unit*" OR "fitness band*" OR "flexible band*" OR headband* OR "head band*" OR wristband* OR "smart insole*" OR "Smart armband" OR bracelet* OR emotiv OR neurosky OR mindo OR starlab OR emsense OR "B-Alert X24" OR enobio OR brainbit OR muse OR openbci OR neuroelectrics OR "G.tec nautilus" OR biosemi OR "mBrainTrain" OR cognionics OR "CGX QUICK" OR fitbit OR garmin OR "Misfit shine" OR "Polar loop" OR jawbone OR geneactiv OR empatica OR amiigo OR actigraph OR "Apple Watch" OR withings OR sensewear OR powerwatch OR "Samsung Galaxy Watch" OR airofit OR amazfit OR vivalink OR "Wellue DuoEK" OR kardiamobile OR "Philips Biosensor" OR biovitals )) AND ( TITLE-ABS-KEY ( mood disorder* OR depress* OR stress* OR distress )) AND ( LIMIT-TO ( LANGUAGE , "English" )) AND ( LIMIT-TO ( PUBYEAR , 2022 ) OR LIMIT-TO ( PUBYEAR , 2021 ) OR LIMIT-TO ( PUBYEAR , 2020 ) OR LIMIT-TO ( PUBYEAR , 2019 ) OR LIMIT-TO ( PUBYEAR , 2018 ) OR LIMIT-TO ( PUBYEAR , 2017 ) OR LIMIT-TO ( PUBYEAR , 2016 ) OR LIMIT-TO ( PUBYEAR , 2015 )) AND ( LIMIT-TO ( DOCTYPE , "ar" ) OR LIMIT-TO ( DOCTYPE , "cp" ) OR LIMIT-TO ( DOCTYPE , "ch" )) | 775     |

|                                   |                                                                                                                                                                                                                                                                                                                                                                                                                                                                                                                                                                                                                                                                                                                                                                                                                                                                                                                                                                                                                                                                                                                                                                                                                                                                                                                                                                                                                                                                                                                                                                                                                                                                                                                                                                                                                                                                                                                                                                                                                                                                                                                                                                                                                                                                                                                                                                                                                                                                                                                                                                                                                                                                |           |
|-----------------------------------|----------------------------------------------------------------------------------------------------------------------------------------------------------------------------------------------------------------------------------------------------------------------------------------------------------------------------------------------------------------------------------------------------------------------------------------------------------------------------------------------------------------------------------------------------------------------------------------------------------------------------------------------------------------------------------------------------------------------------------------------------------------------------------------------------------------------------------------------------------------------------------------------------------------------------------------------------------------------------------------------------------------------------------------------------------------------------------------------------------------------------------------------------------------------------------------------------------------------------------------------------------------------------------------------------------------------------------------------------------------------------------------------------------------------------------------------------------------------------------------------------------------------------------------------------------------------------------------------------------------------------------------------------------------------------------------------------------------------------------------------------------------------------------------------------------------------------------------------------------------------------------------------------------------------------------------------------------------------------------------------------------------------------------------------------------------------------------------------------------------------------------------------------------------------------------------------------------------------------------------------------------------------------------------------------------------------------------------------------------------------------------------------------------------------------------------------------------------------------------------------------------------------------------------------------------------------------------------------------------------------------------------------------------------|-----------|
| <p><b>IEEE Xplore</b></p>         | <p>("Abstract": "Artificial Intelligence" OR "Abstract": "Machine Learning" OR "Abstract": "Deep Learning" OR "Abstract": "supervised learning" OR "Abstract": "unsupervised learning" OR "Abstract": "reinforcement learning" OR "Abstract": "Decision tree" OR "Abstract": "K-Nearest Neighbor" OR "Abstract": "Support vector machine" OR "Abstract": "Recurrent neural network" OR "Abstract": "convolutional neural network" OR "Abstract": "Artificial neural network" OR "Abstract": "Deep Neural Network" OR "Abstract": "Naïve Bayes" OR "Abstract": "Naive Bayes" OR "Abstract": "Fuzzy Logic" OR "Abstract": "K-Means" OR "Abstract": "Random Forest" OR "Abstract": "Long Short-Term Memory Networks" OR "Abstract": "autoencoder" OR "Abstract": "boltzmann machine" OR "Abstract": "deep belief network" OR "Abstract": "Gradient Boost" OR "Abstract": "AdaBoost" OR "Abstract": "Multilayer Perceptron" OR "Abstract": "Ensemble learning") AND ("Abstract": "wearable" OR "Abstract": "wearable" OR "Abstract": "smart watch" OR "Abstract": "smartwatch" OR "Abstract": "smart watches" OR "Abstract": "smartwatches" OR "Abstract": "acceleromet" OR "Abstract": "gyroscop" OR "Abstract": "inertial sensor" OR "Abstract": "inertial measurement unit" OR "Abstract": "fitness band" OR "Abstract": "flexible band" OR "Abstract": "headband" OR "Abstract": "head band" OR "Abstract": "wristband" OR "Abstract": "smart insole" OR "Abstract": "Smart armband" OR "Abstract": "bracelet*" OR "Abstract": "Emotiv" OR "Abstract": "NeuroSky" OR "Abstract": "Mindo StarLab" OR "Abstract": "EmSense" OR "Abstract": "B-Alert X24" OR "Abstract": "Enobio" OR "Abstract": "BrainBit" OR "Abstract": "Muse" OR "Abstract": "OpenBCI" OR "Abstract": "Neuroelectrics" OR "Abstract": "G.tec nautilus" OR "Abstract": "BioSemi" OR "Abstract": "mBrainTrain" OR "Abstract": "Cognionics" OR "Abstract": "CGX QUICK" OR "Abstract": "Fitbit" OR "Abstract": "Garmin" OR "Abstract": "Misfit shine" OR "Abstract": "Polar loop" OR "Abstract": "Jawbone" OR "Abstract": "Geneactiv" OR "Abstract": "Empatica" OR "Abstract": "Amiigo" OR "Abstract": "Actigraph" OR "Abstract": "Apple Watch" OR "Abstract": "Withings" OR "Abstract": "Sensewear" OR "Abstract": "PowerWatch" OR "Abstract": "Samsung Galaxy Watch" OR "Abstract": "Airofit" OR "Abstract": "Amazfit" OR "Abstract": "VivaLINK" OR "Abstract": "Wellue DuoEK" OR "Abstract": "KardiaMobile" OR "Abstract": "Philips Biosensor" OR "Abstract": "Biovitals") AND ("Abstract": "mood disorder*" OR "Abstract": "depress*" OR "Abstract": "stress*" OR "Abstract": "distress")</p> | <p>35</p> |
| <p><b>ACM Digital library</b></p> | <p>[[Abstract: "artificial intelligence"] OR [Abstract: "machine learning"] OR [Abstract: "deep learning"] OR [Abstract: "supervised learning"] OR [Abstract: "unsupervised learning"] OR [Abstract: "reinforcement learning"] OR [Abstract: "decision tree"] OR [Abstract: "k-nearest neighbor*"] OR [Abstract: "support vector machine*"] OR [Abstract: "recurrent neural network*"] OR [Abstract: "convolutional neural network*"] OR [Abstract: "artificial neural network*"] OR [Abstract: "deep neural networks"] OR [Abstract: "naïve bayes"] OR [Abstract:</p>                                                                                                                                                                                                                                                                                                                                                                                                                                                                                                                                                                                                                                                                                                                                                                                                                                                                                                                                                                                                                                                                                                                                                                                                                                                                                                                                                                                                                                                                                                                                                                                                                                                                                                                                                                                                                                                                                                                                                                                                                                                                                         | <p>40</p> |

|                              |                                                                                                                                                                                                                                                                                                                                                                                                                                                                                                                                                                                                                                                                                                                                                                                                                                                                                                                                                                                                                                                                                                                                                                                                                                                                                                                                                                                                                                                                                                                                                                                                                                                                                                                                                                                                                                                                                                                                                                                    |            |
|------------------------------|------------------------------------------------------------------------------------------------------------------------------------------------------------------------------------------------------------------------------------------------------------------------------------------------------------------------------------------------------------------------------------------------------------------------------------------------------------------------------------------------------------------------------------------------------------------------------------------------------------------------------------------------------------------------------------------------------------------------------------------------------------------------------------------------------------------------------------------------------------------------------------------------------------------------------------------------------------------------------------------------------------------------------------------------------------------------------------------------------------------------------------------------------------------------------------------------------------------------------------------------------------------------------------------------------------------------------------------------------------------------------------------------------------------------------------------------------------------------------------------------------------------------------------------------------------------------------------------------------------------------------------------------------------------------------------------------------------------------------------------------------------------------------------------------------------------------------------------------------------------------------------------------------------------------------------------------------------------------------------|------------|
|                              | <p>"naive bayes"] OR [Abstract: "fuzzy logic"] OR [Abstract: "k-means"] OR [Abstract: "random forest"] OR [Abstract: "long short-term memory networks"] OR [Abstract: autoencoder] OR [Abstract: "boltzmann machine"] OR [Abstract: "deep belief network"] OR [Abstract: "gradient boost*"] OR [Abstract: adaboost] OR [Abstract: "multilayer perceptron"] OR [Abstract: "ensemble learning"] AND [[Abstract: wearable*] OR [Abstract: "smart watch*"] OR [Abstract: smartwatch*] OR [Abstract: acceleromet*] OR [Abstract: gyroscop*] OR [Abstract: "inertial sensor"] OR [Abstract: "inertial measurement unit*"] OR [Abstract: "fitness band*"] OR [Abstract: "flexible band*"] OR [Abstract: headband*] OR [Abstract: "head band*"] OR [Abstract: wristband*] OR [Abstract: "smart insole*"] OR [Abstract: "smart armband"] OR [Abstract: bracelet*] OR [Abstract: emotiv] OR [Abstract: neurosky] OR [Abstract: mindo starlab] OR [Abstract: emsense] OR [Abstract: "b-alert x24"] OR [Abstract: enobio] OR [Abstract: brainbit] OR [Abstract: muse] OR [Abstract: openbci] OR [Abstract: neuroelectrics] OR [Abstract: "g.tec nautilus"] OR [Abstract: biosemi] OR [Abstract: "mbraintrain"] OR [Abstract: cognionics] OR [Abstract: "cgx quick"] OR [Abstract: fitbit] OR [Abstract: garmin] OR [Abstract: "misfit shine"] OR [Abstract: "polar loop"] OR [Abstract: jawbone] OR [Abstract: geneactiv] OR [Abstract: empatica] OR [Abstract: amiigo] OR [Abstract: actigraph] OR [Abstract: "apple watch"] OR [Abstract: withings] OR [Abstract: sensewear] OR [Abstract: powerwatch] OR [Abstract: "samsung galaxy watch"] OR [Abstract: airofit] OR [Abstract: amazfit] OR [Abstract: vivalink] OR [Abstract: "wellue duoek"] OR [Abstract: kardiamobile] OR [Abstract: "philips biosensor"] OR [Abstract: biovitals]] AND [[Abstract: mood disorder*] OR [Abstract: depress*] OR [Abstract: stress* or distress]] AND [Publication Date: (01/01/2015 TO 12/31/2022)]</p> |            |
| <p><b>Google Scholar</b></p> | <p>("Artificial Intelligence" OR "Machine Learning" OR "Deep Learning") AND (wearable* OR smartwatch* OR Emotiv OR Mindo OR Muse OR Fitbit OR Garmin OR Geneactiv OR Empatica "Apple Watch" OR "Polar loop") AND (mood disorder* OR depress* OR stress* OR distress)</p>                                                                                                                                                                                                                                                                                                                                                                                                                                                                                                                                                                                                                                                                                                                                                                                                                                                                                                                                                                                                                                                                                                                                                                                                                                                                                                                                                                                                                                                                                                                                                                                                                                                                                                           | <p>100</p> |

**Supplementary Table 12: Data extraction form**

| <b>Extracted data</b>              | <b>Definition</b>                                                                                                                                                                                                               |
|------------------------------------|---------------------------------------------------------------------------------------------------------------------------------------------------------------------------------------------------------------------------------|
| <b>Study Characteristics</b>       |                                                                                                                                                                                                                                 |
| Author                             | The first author of the study.                                                                                                                                                                                                  |
| Year of publication                | The year in which the study was published.                                                                                                                                                                                      |
| Country of publication             | The country where the study was published.                                                                                                                                                                                      |
| Type of publication                | The venue where the study was published: peer-reviewed journal articles, book chapters, dissertations, or conference proceedings                                                                                                |
| Number of participants             | What is the number of participants from which the data was collected?                                                                                                                                                           |
| Mean age (range)                   | What is the mean/range age of the participants?                                                                                                                                                                                 |
| Female percentage                  | What is the female percentage of the participants?                                                                                                                                                                              |
| Participants Health Conditions     | What is the health condition of the participants?                                                                                                                                                                               |
| <b>Wearable AI characteristics</b> |                                                                                                                                                                                                                                 |
| Name of the wearable device        | What is the name of the wearable device (e.g., Fitbit, Empatica, ApplyWatch, ActiWatch, etc..)?                                                                                                                                 |
| Placement of the wearable device   | Where the wearable device is worn during the experiment in paper or normally (wrist, chest, head, ears, forehead, eyes, fingers, foot, etc..)?                                                                                  |
| Aim of AI algorithm                | What was the algorithm used for (diagnosis, screening, monitoring, treatment, prevention, etc..)?                                                                                                                               |
| Problem solving approaches         | What is the problem-solving approach that the algorithm follows (Classification, regression)?                                                                                                                                   |
| AI algorithm used                  | What are the main AI algorithms/models (e.g., RF, SVM, ANN, CNN, RNN, DNN, k-NN, MLP, DBN, DBM, DPN BN, CRT, DT, LASSO, LR, MFA, MLR, MDL, NB, NN, NSC, RBFN) used in the paper?                                                |
| Data sources                       | What is the source of data that was used for developing the algorithms (open source or closed source)?                                                                                                                          |
| Data input                         | What is the data that was used for developing the algorithm?                                                                                                                                                                    |
| Ground truth assessment            | How the actual status (e.g., diagnosis) of the user was confirmed (questionnaire (PHQ-9), interview, test, etc..)?                                                                                                              |
| Type of validation                 | What is the approach that was used to validate the developed algorithm (e.g., Training-test split, K-fold cross-validation, Nested Cross-Validation, Leave One Out cross-validation, Apparent validation, external validation)? |
| Performance measures used          | What are the measures used to assess the performance of the algorithm (accuracy, sensitivity (recall), specificity, precision, AUC, etc..)?                                                                                     |
| Results                            | The highest and lowest results for each performance measure for each algorithm. Calculate the measures if the confusion matrix is reported.                                                                                     |

**Supplementary Table 13: The modified version of the Quality of Diagnostic Accuracy Studies 2 (QUADAS-2)**

| Participants | Signaling questions                                                                                   | Explanation                                                                                                                                                                                                                                                                                                                                                                                                                                                                                                                                                                               |
|--------------|-------------------------------------------------------------------------------------------------------|-------------------------------------------------------------------------------------------------------------------------------------------------------------------------------------------------------------------------------------------------------------------------------------------------------------------------------------------------------------------------------------------------------------------------------------------------------------------------------------------------------------------------------------------------------------------------------------------|
|              | 1.1 Was a consecutive or random sample of patients enrolled?                                          | <p>-Yes: if a consecutive or random sample of eligible patients was enrolled.</p> <p>- No: if patients were selected by convenience;</p> <p>- Unclear: if the study did not report the manner in which participants were enrolled.</p>                                                                                                                                                                                                                                                                                                                                                    |
|              | 1.2 Did the study avoid inappropriate exclusions?                                                     | <p>- Yes: If inclusion and exclusion of participants were appropriate, so participants correspond to unselected participants of interest.</p> <p>- No: If participants are included who would already have been identified as having the outcome and so are no longer participants at suspicion of disease (diagnostic studies), or if specific subgroups are excluded that may have altered the performance of the prediction model for the intended target population.</p> <p>- Unclear: When there is no information on whether inappropriate inclusions or exclusions took place.</p> |
|              | 1.3 Was the sample size sufficient?                                                                   | <p>- Yes: For model validation studies, if the number of participants is <math>\geq 100</math>.</p> <p>- No: For model validation studies, if the number of participants with the outcome is <math>&lt; 100</math>.</p> <p>- Unclear: For model development studies, no information on the number of candidate predictor parameters or number of participants with the outcome, such that the EPV cannot be calculated.<br/>For model validation studies, no information on the number of participants with the outcome.</p>                                                              |
|              | 1.4 Was there a balance in the number of patients between the subgroups (depressed vs. nondepressed)? | <p>- Yes: if the percentage of participants in any group is 66.7 or less of the sample (<math>\leq 2/3</math>).</p> <p>- No: if the percentage of participants in any group is more than 66.7 of the sample (<math>&gt; 2/3</math>).</p> <p>- Unclear: If no information was provided regarding the number of participants in the groups.</p>                                                                                                                                                                                                                                             |
|              | <b>Risk-of-bias assessment:</b><br>Could the selection of                                             | - Low risk of bias: If the answer to all signaling questions is 'Yes' then the risk of bias can be                                                                                                                                                                                                                                                                                                                                                                                                                                                                                        |

|                                          |                                                                                                                                                 |                                                                                                                                                                                                                                                                                                                                                                                                                                                                                                                                                                                 |
|------------------------------------------|-------------------------------------------------------------------------------------------------------------------------------------------------|---------------------------------------------------------------------------------------------------------------------------------------------------------------------------------------------------------------------------------------------------------------------------------------------------------------------------------------------------------------------------------------------------------------------------------------------------------------------------------------------------------------------------------------------------------------------------------|
|                                          | <p>participants have introduced bias?</p>                                                                                                       | <p>considered low. If one or more of the answers is 'No', the judgment could still be low risk of bias, but specific reasons why the risk of bias can be considered low should be provided.</p> <p>- High risk of bias: If the answer to any of the signaling questions is "No" there is a potential for bias, except if defined at low risk of bias above.</p> <p>- Unclear risk of bias: If relevant information is missing for all or some of the signaling questions, and none of the answers to signaling questions is judged to put this domain at high risk of bias.</p> |
|                                          | <p><b>Concerns regarding applicability:</b> Are there concerns that the included participants and setting do not match the review question?</p> | <p>- Low concern for applicability: If the spectrum of participants (in- and exclusion criteria, setting, prior testing) matches the pre-stated requirements in the review question</p> <p>- High concern for applicability: If the spectrum of participants does not fully match the pre-stated requirements in the review question</p> <p>- Unclear concern for applicability: If there is insufficient information available to make a judgment about the applicability</p>                                                                                                  |
| <p><b>Index test (AI algorithms)</b></p> | <p>2.1 Were the AI models described in detail?</p>                                                                                              | <p>-Yes: if the model details were provided such as outputs, epoch, all intermediate layers and connections, pooling, normalization, regularization, and activation in the layers, etc. or if a previously published model is employed, the paper must cite a reference that meets the preceding standards and fully describe every modification made to the model.</p> <p>-No: if only the model's name was reported in the paper, or the study reported some information but other important information still missing.</p>                                                   |
|                                          | <p>2.2 Were all features (predictors) used in the model clearly identified?</p>                                                                 | <p>-Yes: If all features (e.g., heart rate, inter-beat interval, heart rate variation, number of sleep hours, etc.) used in each model were reported.</p> <p>-No: If any features used in any model were not reported. Or all features used in the paper were identified but it was not clear which features were used in each model.</p>                                                                                                                                                                                                                                       |

|  |                                                                                                                                                                                  |                                                                                                                                                                                                                                                                                                                                                                                                                                                                                                                                                                                                                                                                                                                                                                  |
|--|----------------------------------------------------------------------------------------------------------------------------------------------------------------------------------|------------------------------------------------------------------------------------------------------------------------------------------------------------------------------------------------------------------------------------------------------------------------------------------------------------------------------------------------------------------------------------------------------------------------------------------------------------------------------------------------------------------------------------------------------------------------------------------------------------------------------------------------------------------------------------------------------------------------------------------------------------------|
|  | <p>2.3 Were features assessed in the same way for all participants?</p>                                                                                                          | <p>Please notice some studies used different wearable devices to collect the data.</p> <p>-Yes: If the assessment of features assessment were similar for all participants.</p> <p>-No: If different definitions were used for the same predictor or if predictors requiring subjective interpretation were assessed by differently experienced assessors.</p> <p>Unclear: If there is no information on how predictors were defined or assessed.</p>                                                                                                                                                                                                                                                                                                            |
|  | <p>2.4 Were features collected without knowledge of outcome data (depression status)?</p>                                                                                        | <p>- Yes: If outcome information was stated as not used during feature assessment or was clearly not (yet) available to those assessing features.</p> <p>- No: If it is clear that outcome information was used when assessing predictors.</p> <p>- Unclear: No information on whether features were assessed without knowledge of outcome information.</p>                                                                                                                                                                                                                                                                                                                                                                                                      |
|  | <p><b>Risk-of-bias assessment:</b><br/>Could the conduct or interpretation of the index test have introduced bias?</p>                                                           | <p>- Low risk of bias: If the answer to all signaling questions is ‘Yes’ then the risk of bias can be considered low. If one or more of the answers is ‘No’, the judgment could still be low risk of bias, but specific reasons why the risk of bias can be considered low should be provided e.g., the use of objective predictors not requiring subjective interpretation.</p> <p>- High risk of bias: If the answer to any of the signaling questions is “No” there is a potential for bias, except if defined at low risk of bias above.</p> <p>- Unclear risk of bias: If relevant information is missing for all or some of the signaling questions, and none of the answers to signaling questions is judged to put this domain at high risk of bias.</p> |
|  | <p><b>Concerns regarding applicability:</b> Are there concerns that the definition, assessment, or timing of the index test in the model does not match the review question?</p> | <p>- Low concern for applicability: Definition, assessment, and timing of predictors match the review question.</p> <p>- High concern for applicability: Definition, assessment, or timing of predictors were different from the review question.</p>                                                                                                                                                                                                                                                                                                                                                                                                                                                                                                            |



|                                          |                                                                                                              |                                                                                                                                                                                                                                                                                                                                                                                                                                                                                                                                                                                                                                                                                                                                                                                                                                                                                                                                                                                                                                                               |
|------------------------------------------|--------------------------------------------------------------------------------------------------------------|---------------------------------------------------------------------------------------------------------------------------------------------------------------------------------------------------------------------------------------------------------------------------------------------------------------------------------------------------------------------------------------------------------------------------------------------------------------------------------------------------------------------------------------------------------------------------------------------------------------------------------------------------------------------------------------------------------------------------------------------------------------------------------------------------------------------------------------------------------------------------------------------------------------------------------------------------------------------------------------------------------------------------------------------------------------|
|                                          |                                                                                                              | - Unclear concern for applicability: If relevant information about the predictors is not reported.                                                                                                                                                                                                                                                                                                                                                                                                                                                                                                                                                                                                                                                                                                                                                                                                                                                                                                                                                            |
| <b>Reference Standard (Ground truth)</b> | 3.1 Was the reference standard likely to correctly classify the outcome (e.g., depressed vs. non-depressed)? | <p>Is the used tool appropriate?</p> <p>Any tool recommended by APA: BDI, PHQ-9, DSM-IV, DSM-5, HAM-D, GDS, MADRS, CDI, CDRS, BHS, CES-D, EQ-5D, BASC, CBCL, QIDS-SR, RFS, SF-36. Or any tool has reliability and validity of <math>\geq 0.70</math>.</p> <p>Were the assessors/annotators qualified?</p> <p>- Yes: If the study used well-recommended tools such as BDI, PHQ-9, DSM-IV, DSM-5, HAM-D, GDS, MADRS, CDI, CDRS, BHS, CES-D, EQ-5D, BASC, CBCL, QIDS-SR, RFS, SF-36.<br/>Or any tool has reliability and validity of <math>\geq 0.70</math>.<br/>Or an interview was conducted by a qualified assessor such as a psychologist or psychiatrist</p> <p>-No: if the outcome was assessed using only one question (e.g., how depressed do you feel today?).<br/>OR Unknown questionnaire with reliability and validity of <math>&lt; 0.70</math> or unknown reliability and validity.<br/>OR an interview was conducted by unqualified assessors such as students.</p> <p>- Unclear: If no information was provided about the reference standard</p> |
|                                          | 3.2 Was the outcome defined and determined in a similar way for all participants?                            | <p>- Yes: If outcomes were defined and determined in a similar way for all participants.</p> <p>- No: If outcomes were clearly defined and determined in a different way for some participants.</p> <p>- Unclear: No information on whether outcomes were defined or determined in a similar way for all participants.</p>                                                                                                                                                                                                                                                                                                                                                                                                                                                                                                                                                                                                                                                                                                                                    |
|                                          | 3.3 Was the outcome determined without knowledge of predictor information?                                   | <p>- Yes: If predictor information was not known when determining the outcome status, or outcome status determination is clearly reported as determined without knowledge of predictor information.</p> <p>- No: If it is clear that predictor information was used when determining the outcome status.</p> <p>- Unclear: No information on whether the outcome was determined without knowledge of predictor information.</p>                                                                                                                                                                                                                                                                                                                                                                                                                                                                                                                                                                                                                               |
|                                          | 3.4 Was there an appropriate interval                                                                        | Check the period in which the reference standard assesses symptoms of depression. For example, PHQ-9, HDRS-D, MADRS, DASS, GDS, and BDI assess                                                                                                                                                                                                                                                                                                                                                                                                                                                                                                                                                                                                                                                                                                                                                                                                                                                                                                                |

|  |                                                                                                                                            |                                                                                                                                                                                                                                                                                                                                                                                                                                                                                                                                                                                                                                                                                                                                                                                                                                                                                                                                                                                                                                                                      |
|--|--------------------------------------------------------------------------------------------------------------------------------------------|----------------------------------------------------------------------------------------------------------------------------------------------------------------------------------------------------------------------------------------------------------------------------------------------------------------------------------------------------------------------------------------------------------------------------------------------------------------------------------------------------------------------------------------------------------------------------------------------------------------------------------------------------------------------------------------------------------------------------------------------------------------------------------------------------------------------------------------------------------------------------------------------------------------------------------------------------------------------------------------------------------------------------------------------------------------------|
|  | <p>between the index test and the reference standard?</p>                                                                                  | <p>symptoms of depression experienced over the past week. When such tools are used, then the interval between the index test and reference standard should not be more than 7 days.</p> <p>BDI-II: over the past 2 weeks</p> <ul style="list-style-type: none"> <li>- Yes: If the time interval between predictor assessment and outcome determination was appropriate to enable the correct type and representative number of relevant outcomes to be recorded, or if no information on the time interval is required to allow a representative number of the relevant outcome occur or if predictor assessment and outcome determination were from information taken within an appropriate time interval.</li> <li>- No: If the time interval between predictor assessment and outcome determination is too short or too long to enable the correct type and representative number of relevant outcomes to be recorded.</li> <li>- Unclear: If no information was provided on the time interval between predictor assessment and outcome determination.</li> </ul> |
|  | <p><b>Risk-of-bias assessment:</b><br/>         Could the reference standard, its conduct, or its interpretation have introduced bias?</p> | <ul style="list-style-type: none"> <li>- Low risk of bias: If the answer to all signaling questions is 'Yes' then the risk of bias can be considered low. If one or more of the answers is 'No', the judgment could still be low risk of bias, but specific reasons why the risk of bias can be considered low should be provided e.g., when the outcome was determined with knowledge of predictor information but the outcome assessment did not require much interpretation by the assessor (e.g., death regardless of cause).</li> <li>- High risk of bias: If the answer to any of the signaling questions is "No" there is a potential for bias, except if defined at low risk of bias above.</li> <li>- Unclear risk of bias: If relevant information is missing for all or some of the signaling questions, and none of the answers to signaling questions is judged to put this domain at high risk of bias.</li> </ul>                                                                                                                                     |

|                        |                                                                                                                                                            |                                                                                                                                                                                                                                                                                                                                                                                                                                                                                                                                                                                                                                                                                                                         |
|------------------------|------------------------------------------------------------------------------------------------------------------------------------------------------------|-------------------------------------------------------------------------------------------------------------------------------------------------------------------------------------------------------------------------------------------------------------------------------------------------------------------------------------------------------------------------------------------------------------------------------------------------------------------------------------------------------------------------------------------------------------------------------------------------------------------------------------------------------------------------------------------------------------------------|
|                        | <p><b>Concerns regarding applicability:</b> Are there concerns that the outcome definition, timing, or determination do not match the review question?</p> | <ul style="list-style-type: none"> <li>- Low concern for applicability: Outcome definition, timing, and method of determination defines the outcome as intended by the review question.</li> <li>- High concern for applicability: Choice of outcome definition, timing, and method of outcome determination defines another outcome as intended by the review question.</li> <li>- Unclear concern for applicability: If relevant information about the outcome, timing, and method of determination is not reported.</li> </ul>                                                                                                                                                                                       |
| <p><b>Analysis</b></p> | <p>4.1 Were all participants included in the analysis?</p>                                                                                                 | <ul style="list-style-type: none"> <li>- Yes: If all participants enrolled in the study are included in the data analysis.</li> <li>- No: If some or a subgroup of participants are inappropriately excluded from the analysis.</li> <li>- Unclear: No information on whether all enrolled participants are included in the analysis.</li> </ul>                                                                                                                                                                                                                                                                                                                                                                        |
|                        | <p>4.2 Was data preprocessing carried out appropriately?</p>                                                                                               | <ul style="list-style-type: none"> <li>- Yes: If there are no missing values of predictors or outcomes and the study explicitly reports that participants are not excluded on the basis of missing data, or if missing values are handled using multiple imputation.</li> <li>- No: If participants with missing data are omitted from the analysis, or if the method of handling missing data is clearly flawed, e.g., missing indicator method or inappropriate use of last value carried forward, or if the study had no explicit mention of methods to handle missing data.</li> <li>- Unclear: If there is insufficient information to determine if the method of handling missing data is appropriate.</li> </ul> |
|                        | <p>4.3 Was the breakdown of the training, validation, and test sets appropriate?</p>                                                                       | <ul style="list-style-type: none"> <li>- Yes: if the study used an appropriate validation approach.</li> <li>- No: if the study used an inappropriate validation approach.</li> <li>- Unclear: If no information was provided about the validation methods.</li> </ul>                                                                                                                                                                                                                                                                                                                                                                                                                                                  |
|                        | <p>4.4 Was the performance of the model evaluated appropriately?</p>                                                                                       | <ul style="list-style-type: none"> <li>- Yes: If the confusion matrix was presented, Or more than one measure was used and the selected measures were appropriate.</li> </ul>                                                                                                                                                                                                                                                                                                                                                                                                                                                                                                                                           |

|  |                                                                                                                         |                                                                                                                                                                                                                                                                                                                                                                                                                                                                                                                                                                                                                                                                                     |
|--|-------------------------------------------------------------------------------------------------------------------------|-------------------------------------------------------------------------------------------------------------------------------------------------------------------------------------------------------------------------------------------------------------------------------------------------------------------------------------------------------------------------------------------------------------------------------------------------------------------------------------------------------------------------------------------------------------------------------------------------------------------------------------------------------------------------------------|
|  |                                                                                                                         | <p>- No: If the confusion matrix was not presented, and only one measure was reported,<br/>Or the selected measures were not appropriate.</p> <p>- Unclear: If no information was provided on the performance measures</p>                                                                                                                                                                                                                                                                                                                                                                                                                                                          |
|  | <p><b>Risk-of-bias assessment:</b><br/>Could the analysis, its conduct, or its interpretation have introduced bias?</p> | <p>- Low risk of bias: If the answer to all signaling questions is 'Yes' then the risk of bias can be considered low. If one or more of the answers is 'No', the judgment could still be low risk of bias, but specific reasons why the risk of bias can be considered low should be provided.</p> <p>- High risk of bias: If the answer to any of the signaling questions is "No" there is a potential for bias, except if defined at low risk of bias above.</p> <p>- Unclear risk of bias: If relevant information is missing for all or some of the signaling questions, and none of the answers to signaling questions is judged to put the analysis at high risk of bias.</p> |
